1 **Heartfelt Face Perception via the Interoceptive Pathway – a MEG study**

2 **Jaejoong Kim<sup>1</sup>, Hyeong-Dong Park<sup>2</sup>, Ko Woon Kim<sup>1,3</sup>, Dong Woo Shin<sup>1</sup>, Sanghyun Lim<sup>4</sup>, Hyukchan Kwon<sup>4</sup>,**  
3 **Min-Young Kim<sup>4</sup>, Kiwoong Kim<sup>4</sup>, Bumseok Jeong<sup>1</sup>**

4 **<sup>1</sup>Computational Affective Neuroscience and Development Laboratory, KAIST, Graduate School of Medical**  
5 **Science and Engineering, Daejeon, Korea; KAIST Institute for Health Science and Technology, KAIST,**  
6 **Daejeon, Korea; <sup>2</sup>Laboratory of Cognitive Neuroscience, Center for Neuroprosthetics and Brain Mind**  
7 **Institute, Ecole Polytechnique Fédérale de Lausanne (EPFL), 9 Chemin des Mines, 1202 Geneva,**  
8 **Switzerland; <sup>3</sup>Department of Neurology, Chonbuk National University Hospital, Chonbuk National**  
9 **University Medical school, JeonJu, Korea; <sup>4</sup>Center for Biosignals, Korea Research Institute of Standards**  
10 **and Science, Daejeon, South Korea**

11

12 **Abstract**

13 The somatic marker hypothesis proposes that cortical representation of visceral signals is a  
14 crucial component of emotion processing. There has been no previous study investigating the  
15 causal relationship among brain regions of visceral information processing during emotional  
16 perception. In this magnetoencephalography study of 32 healthy subjects, heartbeat evoked  
17 potential (HEP), which reflects cortical processing of heartbeats, was modulated by the  
18 perception of sad faces, but not other faces and text-based emoticons. We here provide the first  
19 evidence for an increased causal flow of heartbeat information from the right posterior insula  
20 to the anterior insula to the anterior cingulate cortex and from the right globus pallidus to the  
21 prefrontal cortices by sad faces. Moreover, this effect was not an effect of visual evoked  
22 potential, which indicates separate systems of interoceptive and visual processing. These  
23 findings provide important progress in the understanding of brain-body interaction during  
24 emotion processing.

## 1 **Introduction**

2 According to the James-Lange theory and the somatic marker hypothesis, emotional feelings  
3 are the mental experience of bodily states (A. Damasio & Carvalho, 2013; James, 1884). More  
4 specifically, emotional stimuli usually induce a change of bodily status (Williams et al., 2005).  
5 Then various feelings subsequently emerge from the perception of bodily status including a  
6 sense of viscera (A. Damasio & Carvalho, 2013). Many previous studies showed evidence of  
7 emotional stimulus-evoked somatic response. For example, a fearful stimulus enhances  
8 sympathetic responses like heart rate elevation and skin conductance modulation (Critchley et  
9 al., 2005; Williams et al., 2005), and a disgusting stimulus induces tachygastria (Harrison, Gray,  
10 Gianaros, & Critchley, 2010). Moreover, neuroimaging studies using fMRI or EEG have shown  
11 that generation of bodily responses by an emotional stimulus is related to activation of  
12 subcortical regions like the amygdala and hypothalamus (A. R. Damasio et al., 2000). On the  
13 other hand, there is rare evidence that supports a change of cortical interoceptive processing in  
14 the brain while experiencing emotional feeling. Given that signal of internal organs are cannot  
15 be identifiable without explicit measuring devices like electrocardiogram (ECG), it is difficult  
16 to investigate which brain activity was directly evoked by interoceptive signals. Thus, previous  
17 studies explored changes in the interoceptive processing during just the experience of  
18 emotional states and reported their relation with the anterior insula and anterior cingulate cortex  
19 (Adolfi et al., 2016; Critchley et al., 2005).

20 Heartbeat evoked potential (HEP), which is obtained by averaging electrophysiological signals  
21 time-locked to heartbeats, has been reported to be associated with the perception of heartbeat  
22 (Pollatos & Schandry, 2004), pain (Shao, Shen, Wilder-Smith, & Li, 2011), and feeling  
23 empathy (Fukushima, Terasawa, & Umeda, 2011). Moreover, HEP amplitude is attenuated in  
24 mood-related psychiatric disorders, including depression (Terhaar, Viola, Bär, & Debener, 2012)

1 and borderline personality disorder (Müller et al., 2015), suggesting a potential link between  
2 HEP and aberrant emotional processing.

3 Based on these theories and indirect evidence, we hypothesized that HEP would be associated  
4 with the feeling of emotional stimuli and would be modulated during perception of emotional  
5 expression such as face and emoticon. And the modulation effect would be different between  
6 positive and negative valences.

7 To test this idea, we used emotional faces and emotional emoticons that convey text-based  
8 emotion to evoke emotional feeling while measuring the HEP with magnetoencephalography  
9 (MEG). To verify the precise source of HEP modulation, T1-weighted structural magnetic  
10 resonance imaging (MRI) was acquired from all subjects. Importantly, we applied Granger  
11 causality analysis (Barnett & Seth, 2014) on sources to identify information flow between  
12 sources of HEP modulation.

13 We formulated the following specific hypotheses. First, we expected that HEP would be  
14 modulated by the emotional expression and this effect would appear in different spatiotemporal  
15 dynamics between emotional and neutral stimulus presentation. Second, the modulation of  
16 HEP by emotional expression would be localized in the previously known interoceptive region  
17 like the anterior/posterior insula and the anterior cingulate cortex in source level analysis. Third,  
18 we expected that information flow between these interoceptive regions would be modulated by  
19 emotional expression. To be more specific, we expected that bottom up heartbeat information  
20 processing starting from the posterior insula, which is the primary interoceptive sensory cortex  
21 (Barrett & Simmons, 2015), to the anterior insula would be enhanced by emotional expression,  
22 which is the pathway of generating emotional feeling predicted by the somatic marker  
23 hypothesis (A. Damasio & Carvalho, 2013). Finally, we hypothesized that neural activity that  
24 are evoked by heartbeat would have different spatiotemporal patterns compared to visual

1 evoked cortical activity. That is, we expected that locking the MEG signals by the cardiac signal  
2 would make the visual evoked effect disappear and vice versa.

3

#### 4 **Methods**

##### 5 **Participants**

6 Forty healthy participants (19 females, mean age of  $24.03 \pm 3.28$  years) volunteered in the  
7 experiment. The expected effect sizes were not known in advance, so we chose a sample size  
8 of approximately 40 participants which was approximately two times more than those of  
9 previous MEG and EEG studies of HEP (Babo-Rebelo, Richter, & Tallon-Baudry, 2016;  
10 Fukushima et al., 2011; H.-D. Park, Correia, Ducorps, & Tallon-Baudry, 2014). All subjects  
11 had no neurological or psychological disease. MEG recording consisting of 4 runs was  
12 completed with one visit. High resolution T1 weighted MRI scans were acquired at another  
13 visit. In this MRI session, all subjects performed both functional MRI experiments consisting  
14 of emotion discrimination (unpublished) and/or decision (unpublished) tasks, and other  
15 structural MRIs such as diffusion tensor imaging (unpublished). Among forty subjects, we  
16 failed to acquire MEG data for five subjects due to magnetic field instability. Another three  
17 subjects were excluded in analysis because their ECG data were too noisy or absent. Therefore,  
18 thirty-two subjects were included for further analysis. All participants submitted written  
19 informed consent to participate in the experiment. The study was approved by the Korean  
20 Advanced Institute of Science and Technology Institutional Review Boards in accordance with  
21 the Declaration of Helsinki.

22

##### 23 **Standardization of emotional stimuli**

1 Stimuli consisted of forty-five emotional faces and forty-five text-based emotional emoticons.  
2 Forty-five faces expressing happy, sad, and neutral emotions were selected from the Korean  
3 Facial Expressions of Emoticon (KOFEE) database (J. Y. Park et al., 2011). Text-based happy  
4 and sad emoticons were searched for on the world-wide web. Then we produced scrambled  
5 emoticons that did not have configurable information, and then these scrambled emoticons  
6 were used as emoticons of a neutral condition. Ninety emotional expressions, including faces  
7 and text-based emoticons, were standardized in independent samples consisting of forty-seven  
8 healthy volunteers (21 females, mean age of  $28.43 \pm 4.31$  years). These participants were asked  
9 to rate the feeling they have felt toward emotional expressions composed of 90 stimuli (45  
10 faces and 45 facial emoticons of happy, neutral, and sad emotions) on an 11 point Likert scale  
11 (-5 to +5). We compared the mean absolute value of four emotional expressions that we called  
12 ‘feeling intensity’ or ‘emotionality’ (Citron, Gray, Critchley, Weekes, & Ferstl, 2014). Repeated  
13 measures analysis of variance (RANOVA) of 2 (face, emoticon) by 3 valences (happy, sad,  
14 neutral) design were performed on the emotionality score. There was a significant main effect  
15 of valence ( $F(1.744, 80.228) = 272.618, P < 0.001$ , Greenhouse-Geisser corrected), while there  
16 were no differences between emoticons and faces ( $F(1, 46) = 0.011, P = 0.919$ ) and no  
17 interaction between those two main effects ( $F(1.685, 77.488) = 0.285, P = 0.818$ , Greenhouse-  
18 Geisser corrected). In addition, a post-hoc t-test revealed that there was no difference between  
19 sad and happy conditions ( $P = 0.082$ ) with a significant difference between emotional and  
20 neutral conditions ( $P < 0.001$  in both sad and happy contrast to neutral). Additionally,  
21 participants of the main experiments also underwent the rating procedure above before the  
22 MEG recording.

23

24 **MEG experimental task**

1 During the MEG recording, ninety stimuli consisting of 45 faces and 45 text-based emoticons  
2 were presented in the center of the screen using in-house software, the KRISSEMEG Stimulator  
3 4. The size, duration, and stimulus onset asynchrony (SOA) of all the stimuli were 27×18 cm,  
4 500ms and 1500ms, respectively, and the order of stimuli presentation was pseudo-randomized.  
5 Participants completed 4 runs and each run contained 180 stimuli (30 sad faces, 30 happy faces,  
6 30 neutral faces, 30 sad emoticons, 30 happy emoticons, 30 neutral emoticons each) and took  
7 270s. In addition, to maintain the participants' attention to task, the participants were instructed  
8 to discriminate between sad and happy by pressing a button when a question mark appeared.  
9 The question mark randomly appeared on the screen every 9 to 15 trials.

10

## 11 **Acquisition**

12 A 152-channel MEG system (KRISSE MEG, Daejeon, Korea, 152 axial first-order double-  
13 relaxation oscillation superconducting quantum interference device (DRQS) gradiometers)  
14 covering the whole head was used to make MEG recordings in a magnetically shielded room  
15 for 60–90 minutes at a sampling rate of 1,024 Hz. The relative positions of the head and the  
16 MEG sensors were determined by attaching four small positioning coils to the head. The  
17 positions of the coils were recorded at intervals of 10–15 min by the MEG sensors to allow co-  
18 registration with individual anatomical MRI data. The maximum difference between head  
19 positions before and after the run was deviation < 2mm and goodness of fit (GoF) > 95%. The  
20 EEG system for eye and muscle artifacts recordings were made simultaneously with the MEG  
21 recordings. During MEG recording, participants were seated with their heads leaning backward  
22 in the MEG helmet. The translation between the MEG coordinate systems and each  
23 participant's structural MRI was made using four head position coils placed on the scalp and  
24 fiducial landmarks (Hämäläinen, Hari, Ilmoniemi, Knuutila, & Lounasmaa, 1993).

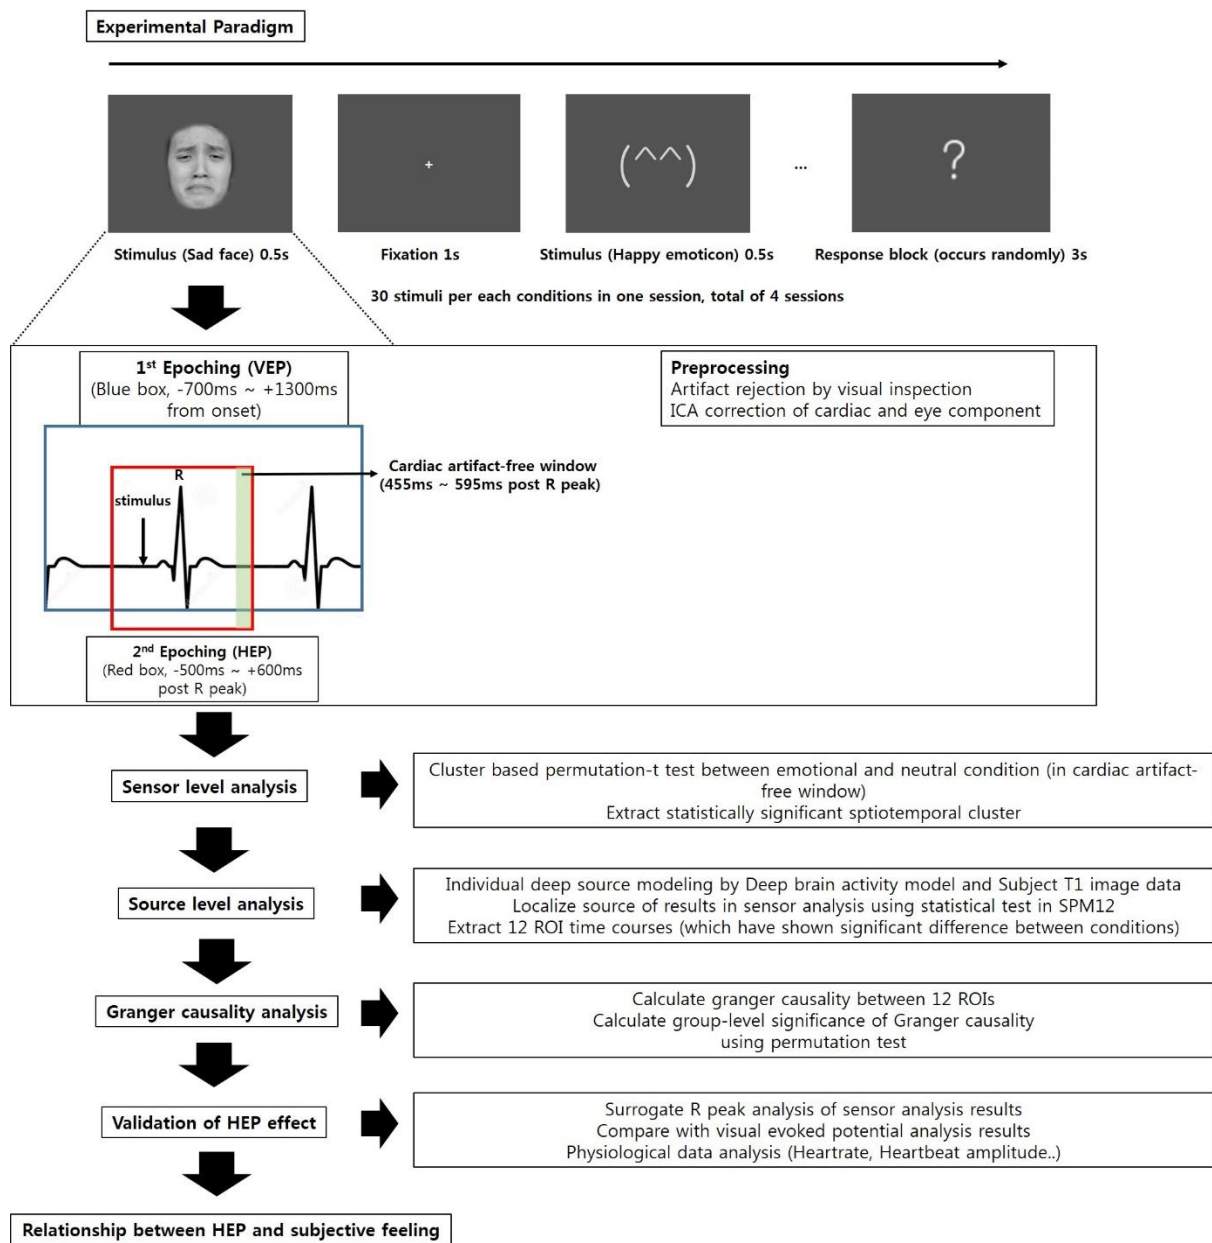

2 **Figure 1. Overall experimental flow**

3

#### 4 **Data preprocessing**

5 Data were processed with a Fieldtrip toolbox (Oostenveld, Fries, Maris, & Schoffelen, 2011).

6 First, raw data were epoched from 700ms before stimulus onset to 1300ms after stimulus onset.

7 Epochs containing HEP large artifacts were rejected by visual inspection. After artifact trial rejection,

1 the eye movement artifact and the cardiac field artifact were removed by independent  
2 component analysis (ICA) using the function “ft\_componentanalysis” with the runICA  
3 algorithm. Twenty components were identified for each six conditions. Two neurologists  
4 visually inspected each component, and components that showed typical spatial and temporal  
5 patterns of the cardiac field artifact, eye blinking and movement noise were removed. After  
6 removing the noise, the data were filtered with a 1-40 Hz Butterworth filter. Then, the heartbeat  
7 evoked potential (HEP) for each stimulus condition was extracted by subsequent epoching  
8 which was time-locked to the R peak of every epoch. R peaks were detected using the Pan-  
9 Tompkins algorithm (Pan & Tompkins, 1985) and the HEP of each condition was extracted by  
10 epoching 500 ms before the R peak to 600 ms after the R peak in the epoch of each condition.  
11 Because a heartbeat enters the central nervous system (CNS) around 200ms after the R peak  
12 by vagal afferent stimulation at the carotid body (Eckberg & Sleight, 1992) and a visual  
13 stimulus enters the CNS immediately through the retina, a heartbeat that occurs before a -  
14 200ms visual stimulus onset stimulates the brain earlier than a visual stimulus onset. Therefore,  
15 we excluded R peaks that occurred before 200 ms of a stimulus onset to include heartbeat  
16 evoked processing that occurred only after visual stimulus. Therefore, this procedure excluded  
17 cortical input of a heartbeat that has occurred before the visual stimulus. The R peak after  
18 700ms of stimulus onset was also excluded because that HEP epoch would contain the next  
19 visual stimulus onset. Finally, a baseline correction was performed using a pre-R-peak interval  
20 of 300ms and trials of the same condition for each subject were averaged.

21

## 22 **Sensor analysis**

23 **Cluster-based permutation based paired t-test between each emotional condition and**  
24 **neutral condition**



1 We compared the HEP of the emotional condition and a neutral condition. Four tests were  
2 performed including a sad face vs. a neutral face, a happy face vs. a neutral face, a sad emoticon  
3 vs. a neutral emoticon, a happy emoticon vs. a neutral emoticon. To deal with multiple  
4 comparison problems, we used a cluster-based permutation paired t test. These tests were done  
5 as follows. First, paired t tests were performed at all time points between 455 and 595 ms and  
6 all sensors. Then significant spatiotemporal points of uncorrected p-values below 0.05 (two-  
7 tailed) were clustered by the spatiotemporal distance and the summed t-value of each cluster  
8 were calculated. After calculating the cluster t-stat, permutation distribution was made by  
9 switching condition labels within subjects randomly, calculating the t-value, forming clusters  
10 as mentioned above, selecting the maximum cluster t-value and repeating this procedure 5000  
11 times. Finally, after the maximum cluster t-values of each permutation made the permutation  
12 distribution, the corrected p-value original clusters were calculated. A time window of 455-  
13 595ms after each R peak, which is known to have the minimal influence on the cardiac field  
14 effect (less than 1%) was submitted as input of the test. Data were downsampled to 128 Hz to  
15 make the computation efficient.

16

## 17 **Source analysis**

18 Source reconstruction was implemented in the MATLAB package Brainstorm (Tadel, Baillet,  
19 Mosher, Pantazis, & Leahy, 2011). To estimate the time courses of both cortical and subcortical  
20 activity, we used the default settings in open source Matlab toolbox Brainstorm's  
21 implementation of the Deep Brain Activity model using the minimum norm estimate (MNE)  
22 (Attal & Schwartz, 2013; Tadel et al., 2011). First, cortical surfaces and subcortical structures,  
23 including the amygdala and basal ganglia, were generated for each subject from 3T MPRAGE  
24 T1 images using Freesurfer (Fischl, 2012). The individual heads/parcellations were then read

1 into Brainstorm (Tadel et al., 2011) along with track head points to refine the MRI registration.  
2 In Brainstorm, a mixed surface/volume model was generated, and 15,000 dipoles were  
3 generated on the cortical surface and another 15,000 dipoles were generated in subcortical  
4 structure volume. Refining the registration with the head points improves the initial MRI/MEG  
5 registration by fitting the head points digitized at the MEG acquisition and the scalp surface.  
6 Using the individual T1 images and transformation matrix generated as above, a forward model  
7 was computed for each subject using a realistic overlapping spheres model. The source activity  
8 for each subject was computed using the MNE (Brainstorm default parameters were used). The  
9 source map was averaged over a time window of 488ms to 515ms - which showed a significant  
10 difference between a sad face and a neutral face at a sensor level (other emotional conditions  
11 were not significantly different from neutral conditions). Then this averaged spatial map was  
12 exported to SPM12 software (Wellcome Department of Cognitive Neurology, London, UK,  
13 <http://www.fil.ion.ucl.ac.uk/spm>) and subsequent statistical tests were performed. Paired-t tests  
14 were used to identify regions that had a different HEP time course within the selected time  
15 window between the sad face and the neutral face. Moreover, to test the absolute activation  
16 difference between two conditions, we additionally exported the absolute spatial map to  
17 SPM12 and applied the paired t-test design.

18

### 19 **Granger causality analysis of HEP source activity**

20 After identifying brain regions that had different time courses, we performed a Granger  
21 causality analysis (Barnett & Seth, 2014) on time courses of those regions to determine whether  
22 effective connectivity between those regions is modulated differently in emotional expression  
23 condition compared to the neutral condition. In Granger causality (Granger, 1988) analysis, it  
24 says that time course Y G causes time course X if the past time points of Y and X explains X

1 better than the past of X alone. It is formulated by the log-likelihood ratio between the residual  
2 covariance matrix of the model that explains X by the past of X and Y and the residual  
3 covariance matrix of the model that explains X by the past of X alone (Barnett & Seth, 2014).

$$\mathbf{X}_t = \sum_{k=1}^p \mathbf{A}_{xx,k} \cdot \mathbf{X}_{t-k} + \sum_{k=1}^p \mathbf{A}_{xy,k} \cdot \mathbf{Y}_{t-k} + \boldsymbol{\epsilon}_{x,t}$$

$$\mathbf{X}_t = \sum_{k=1}^p \mathbf{A}'_{xx,k} \cdot \mathbf{X}_{t-k} + \boldsymbol{\epsilon}'_{x,t}$$

$$F_{Y \rightarrow X} = \ln \left| \frac{\Sigma'_{xx}}{\Sigma_{xx}} \right|$$

7 where A is the matrix of the regression coefficient, Epsilon is the residual, Sigma is the covariance  
8 matrix of the residual, and F is the Granger causality of X and Y. All these calculations were done using  
9 a multivariate Granger causality toolbox (MVGC toolbox) (Barnett & Seth, 2014).

10 To calculate the Granger causality, we first extracted the absolute source time courses (455ms-  
11 595ms after the R peak) of twelve regions of interest (ROI), which showed the difference  
12 between conditions in our previous source analysis for every trial for each subject. This process  
13 resulted in three-dimensional matrices of 12 (ROI) \* a number of time points in each trial \* the  
14 number of trials for every subject and were used as input for the Granger causality analysis.  
15 ROIs include the right anterior insula (RAI), right posterior insula (RPI), bilateral anterior  
16 cingulate cortex (RACC and LACC), right globus pallidus (RGP), right putamen (RP), right  
17 amygdala (RAMG), right superior prefrontal cortex (RSFG), right middle prefrontal cortex  
18 (RMFG), right inferior frontal cortex (RIFG), right ventromedial prefrontal cortex (RvmPFC),  
19 and left orbitofrontal cortex (LOFC). The subcortical structure, the RGP, RP, and RAMG, was  
20 chosen as single volume while other cortical ROIs were defined by a single voxel that was  
21 significant in the source analysis and surrounding voxels. Detailed information of the ROIs,

1 including the coordinates, size and inclusion criteria, are provided in the supplementary  
2 materials. (Briefly, regions that have shown a significant difference below a cluster level FDR  
3 corrected threshold of  $p < 0.05$  in the paired test between two conditions were used as ROIs.)  
4 After extracting the time courses of 12 ROIs, we performed a Granger causality analysis on  
5 that ROI time courses of each subject using the MVGC toolbox (Seth et al, 2014). This analysis  
6 returned a 12 by 12 Granger causality matrix which consisted of the Granger causality of each  
7 pair of ROIs for every subject. To test the group-level significance of the averaged Granger  
8 causality over a subject, we used a permutation method. We generated 1000 surrogate Granger  
9 causality matrices to make the permutation distribution of the averaged Granger causality. For  
10 each iteration, we permuted half of the trials between the emotional condition and neutral  
11 condition for each subject. Then, the Granger causality matrix of every subject was computed  
12 and these matrices were averaged over subjects. These processes were iterated for 1000 times  
13 so that 1000 surrogate averaged Granger causality matrices were generated. Finally, the  
14 statistical significance of the original Granger causality matrix was tested by finding the  
15 position of original Granger causality in permutation distribution. These surrogate Granger  
16 causality matrix analyses were done for an emotional condition, neutral condition, and  
17 emotional – neutral condition separately. In addition, because Granger causality is positively  
18 biased (Barnett, Seth, 2014), the significance value was calculated in a one-tailed fashion to  
19 determine whether or not the Granger causality in emotional and neutral condition is  
20 significantly larger. In contrast, in the emotional-neutral condition, the significance value was  
21 calculated in a two-tailed method because it has a symmetric distribution reflecting both  
22 increased and decreased Granger causality. In addition, to use a sufficient number of time points  
23 in the Granger causality analysis, we used data that were resampled to 512 Hz (the previous  
24 sensor and source analysis used 128 Hz data).

1 **Analysis of physiological data**

2 **Heartbeat distribution in each condition**

3 To show that the HEP effect does not result from a biased heartbeat distribution, within the  
4 original visual epoch, we divided the visual epoch between -200ms and 700ms, which was the  
5 beginning and end of the HEP epoching, by 100ms time windows (total of nine time bins) and  
6 counted how many heartbeats there were in those time windows. We did this for every  
7 condition. Then, the analysis of variance between nine time bins was performed to test whether  
8 the occurrence of heartbeats was the same in every time bin.

9 **Heartrate modulation in each condition**

10 The heartrate in every condition was calculated for each subject. Then, an analysis of variance  
11 between every condition was performed to test whether the heartrate were different across  
12 conditions.

13

14 **Analysis to exclude effect of visual processing**

15 **Surrogate R peak analysis**

16 To test whether the HEP modulation effect is time-locked to the heartbeat, we created 100  
17 surrogate heartbeats that were independent of original heartbeats (H.-D. Park et al., 2016; H.-  
18 D. Park et al., 2014). Then we computed the surrogate HEP with surrogate heartbeats and  
19 performed the same cluster based permutation t-test between conditions that showed a  
20 significant difference in the sensor level analysis. Finally, we made the distribution of  
21 maximum cluster statistics of a surrogate R peak and the calculated position of our original  
22 cluster statistics in this distribution to show that the heartbeat-locked effect is significantly large

1 in such a distribution.

## 2 **Analysis of visual evoked potential (VEP)**

3 To test whether or not the HEP modulation effect is confounded by the visual evoked potential  
4 effect, we performed the same cluster based permutation test with a visual stimulus-locked  
5 potential and compared the topology of significant clusters between HEP clusters and VEP the  
6 sensor level. Then, we performed the source localization of the VEP activity in a significant  
7 cluster time window and exported it to SPM12 to perform a statistical test between emotional  
8 and neutral conditions with the same methods used in the HEP analysis (including the absolute  
9 value difference). Then we compared resulting source with the result of the HEP analysis. This  
10 VEP analysis was not done for all conditions but for conditions that had a significant HEP  
11 modulation effect so that we could compare significant modulation of the HEP with the VEP  
12 effect. (In our experiment, the sad face was the only condition that had a significant HEP  
13 modulation.)

14

## 15 **Results**

### 16 **Sensor analysis**

#### 17 **Significant difference in the HEP between sad face and neutral face perception**

18 A HEP cluster showing a significant difference between sad face and neutral face perception  
19 was found in the right frontocentral sensors within a 488ms-515ms time range (Monte-Carlo  $p$   
20 = 0.046). In other conditions, including happy face vs neutral face (Monte-Carlo  $p$  = 0.396),  
21 sad emoticon vs neutral emoticon (Monte-Carlo  $p$  = 0.857), happy emoticon vs neutral  
22 emoticon (Monte-Carlo  $p$  = 0.710), there were no significantly different clusters showing a  
23 different HEP amplitude.

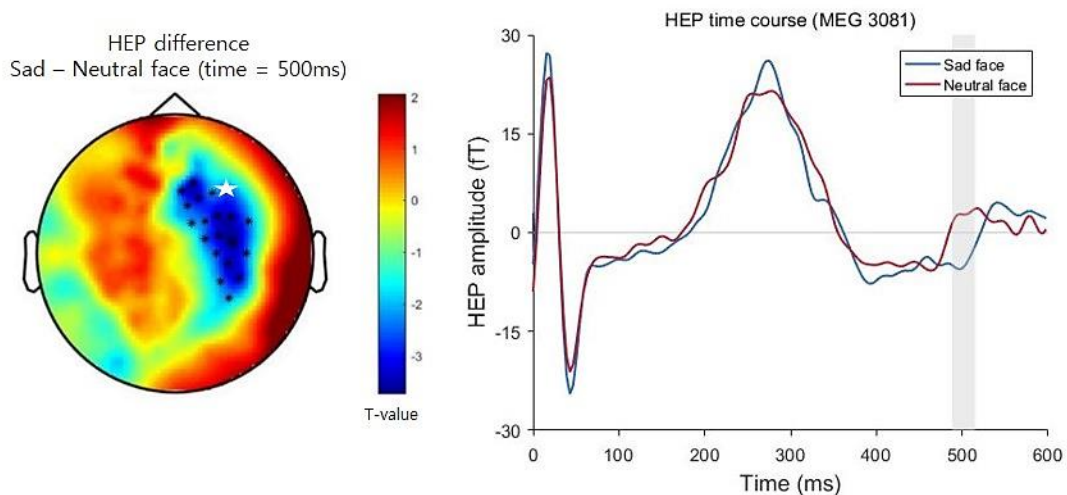

1

2 **Figure 2. Topographic map (left) of the differences in HEP between sad vs. neutral face**  
3 **conditions and a single channel plot among significant clusters (right) – The channel**  
4 **plotted in the right figure are marked as a white star in the left topographic map.**

5 Figure 2 (left) – source data 1

6 Statistical result of differences in HEP between sad vs. neutral face (in cluster based  
7 permutation t test).

8 Figure 2 (right) – source data 2

9 Time course of HEP (fT) induced by sad vs. neutral face in 455ms ~ 595ms time window in  
10 MEG3081 sensor.

11

## 12 **Source analysis**

### 13 **Interoceptive network and prefrontal-basal ganglia network as sources of HEP** 14 **modulation in sad faces**

15 To find the brain region underlying modulation of the HEP in sad face conditions, source  
16 reconstructions of the MEG signal in a sad face and neutral face were done in brainstorm and

1 paired t-test of the two conditions were done in SPM12 (with a spatial map that was averaged  
2 within the time range of 488ms-515ms after the R peak). With the cluster-forming threshold  
3 using  $p$ -value = 0.01 and 10 adjacent voxels, several regions that have different HEP time  
4 courses between a sad face and a neutral face were identified. Four significant clusters appeared.  
5 Briefly, these clusters included the right prefrontal cortices, anterior insula, anterior cingulate  
6 cortex, and basal ganglia. More specifically, the first cluster (red,  $p = 0.003$ , cluster level  
7 family-wise error (FWE) corrected) included the right prefrontal regions that consisted of the  
8 right superior frontal gyrus (RSFG), which is close to the dorsomedial prefrontal cortex  
9 (dmPFC), and the middle frontal gyrus (RMFG), which corresponded to the dorsolateral  
10 prefrontal cortex (dlPFC). The second cluster (green,  $p = 0.001$ , cluster level FWE corrected)  
11 included the right anterior insula (RAI) and the right putamen (RP). The third cluster (blue,  $p$   
12 = 0.003, cluster level FWE corrected) included the right anterior cingulate cortex (RACC) and  
13 the left anterior cingulate cortex (LACC). Finally, the fourth cluster (pink,  $p < 0.001$ , cluster  
14 level FWE corrected) included the right basal ganglia, which consisted of the right globus  
15 pallidus (RGP) and right putamen (RP). Previous studies reported ACC and AI as a source of  
16 HEP (Couto et al., 2015; H.-D. Park et al., 2017; H.-D. Park et al., 2014). Additionally, in a  
17 paired t-test using the absolute value of time courses, right ventromedial prefrontal cortex  
18 (RvmPFC) and left orbitofrontal cortex (LOFC) clusters were found, which is also a region  
19 known to process interoceptive information; a detailed result of this analysis is provided in the  
20 supplementary materials.

21

22

23



1 **Table 1. Clusters showing significant different time courses between sad face and neutral**  
2 **face conditions**

| Cluster                            | Region      | MNI coordinate | Cluster size<br>(voxel number) | F value | Cluster P value<br>(FWE corrected) |
|------------------------------------|-------------|----------------|--------------------------------|---------|------------------------------------|
| <b>Cluster 1</b><br><b>(Red)</b>   | Rt. SFG     | 21 20 42       | 311                            | 23.13   | 0.003                              |
|                                    | Rt. MFG     | 33 18 36       |                                | 12.86   |                                    |
| <b>Cluster 2</b><br><b>(Green)</b> | Rt. AI      | 27 24 6        | 379                            | 20.02   | 0.001                              |
|                                    | Rt. Putamen | 31 6 8         |                                | 12.08   |                                    |
| <b>Cluster 3</b><br><b>(Blue)</b>  | Rt. ACC     | 9 40 10        | 313                            | 17.32   | 0.003                              |
|                                    | Lt. ACC     | -3 22 28       |                                | 14.68   |                                    |
| <b>Cluster 4</b><br><b>(Pink)</b>  | Rt. putamen | 27 -8 0        | 412                            | 16.59   | <0.001                             |
|                                    | Rt. GP      | 21 0 2         |                                | 15.30   |                                    |

3 **SFG: superior frontal gyrus, AI: anterior insula, MFG: middle frontal gyrus, ACC: anterior cingulate**  
4 **cortex, GP: globus pallidus (voxel size: 1mm x 1mm x 1mm)**

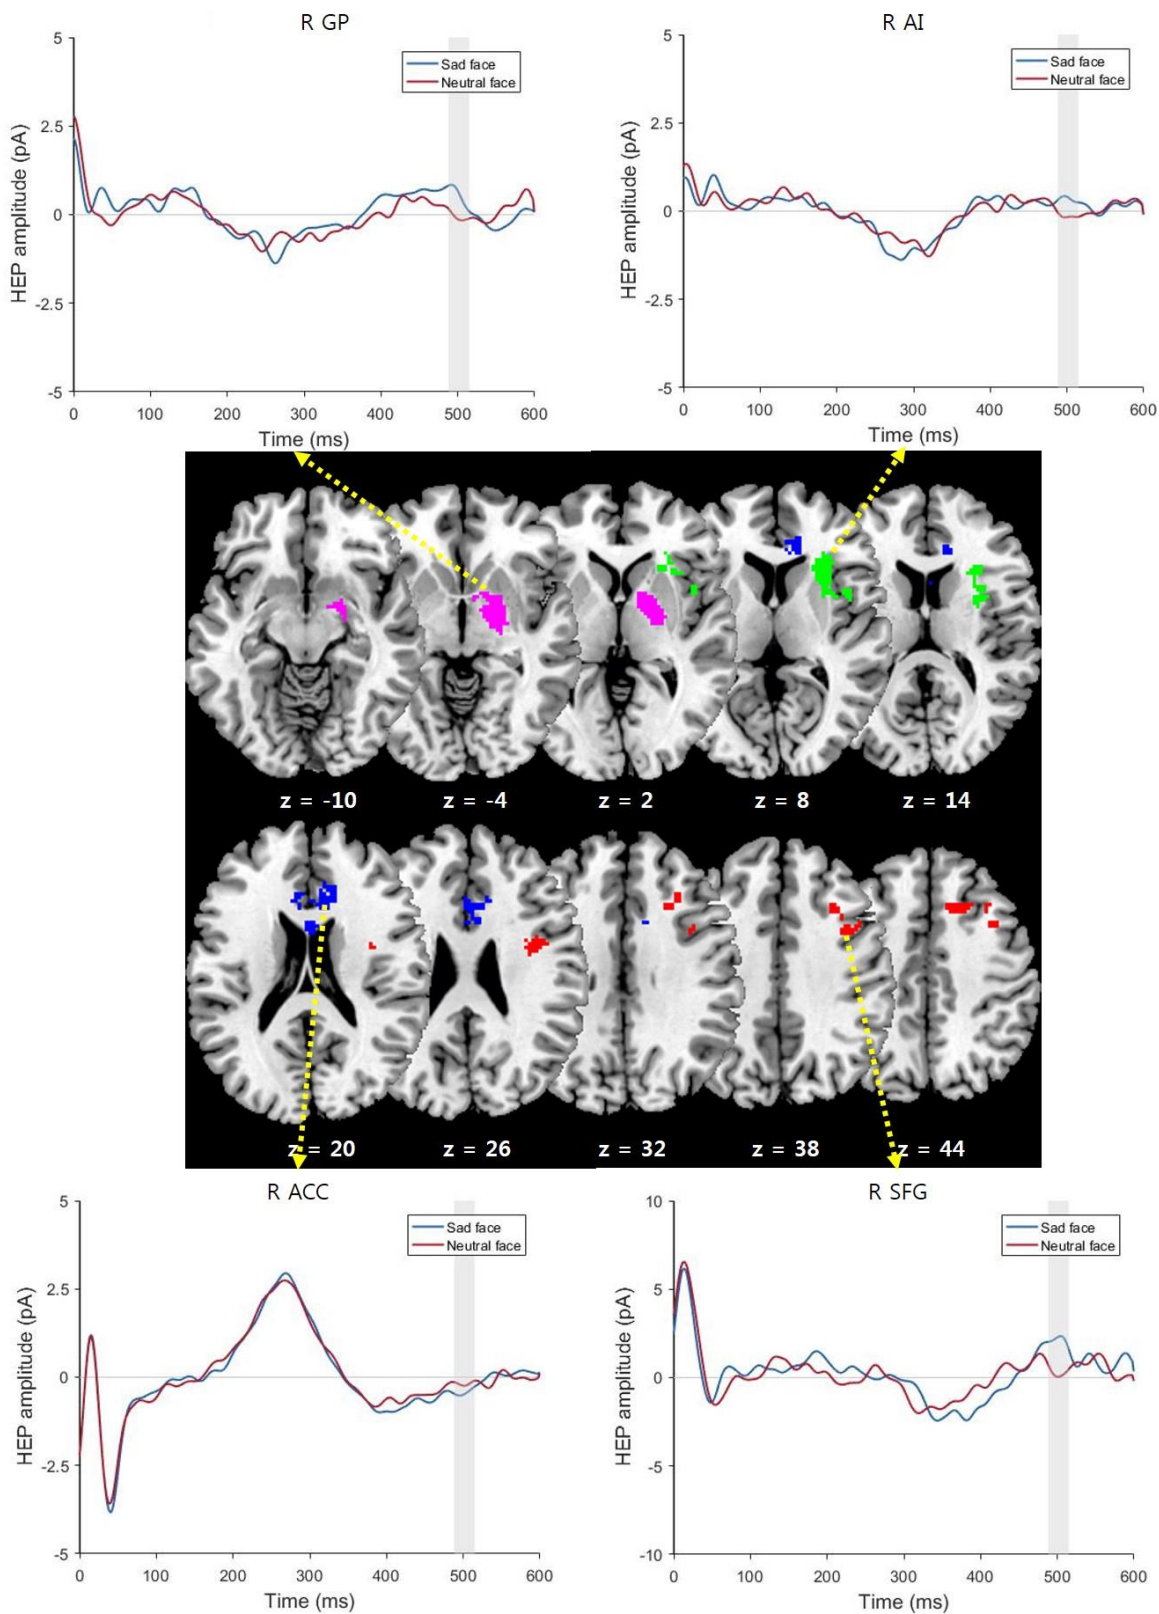

1

2 **Figure 3. Brain regions showing differences in HEP modulation in the contrast of sad vs.**

3 **neutral face conditions and the mean time courses of HEP from 25 voxels around peak**

1 **voxels (the yellow dashed arrow connects the region of cluster and corresponding time**  
2 **courses of that region)**

3

4 **Granger causalities among brain regions**

5 **Increased bottom up interoceptive information from the right posterior insula to the right**  
6 **anterior insula to the right anterior cingulate cortex in sad face perception.**

7 To investigate the causal relationship among regions that have shown differential HEP time  
8 courses between the sad face and neutral face, we performed a Granger causality analysis  
9 within these regions. Selection criteria of ROIs are provided in supplementary materials. In the  
10 Granger causality analysis results, the Granger causality from RPI to RAI (Monte-Carlo  $p =$   
11  $0.04$ ) and RAI to RACC increased (Monte-Carlo  $p = 0.032$ ) in sad face HEP processing over  
12 that of the neutral face, which reflects increased bottom-up interoceptive information  
13 processing (Craig & Craig, 2009; Simmons et al., 2013; Smith & Lane, 2015). Moreover, the  
14 Granger causality from GP to both RSFG and RMFG increased (Monte-Carlo  $p = 0.018$  and  
15  $0.014$  each) which reflects an increase in pallidoprefrontal information flow. However, the  
16 Granger causality from RACC to RMFG (Monte-Carlo  $p = 0.024$ ) and LOFC to RvmPFC  
17 (Monte-Carlo  $p = 0.04$ ) decreased. Except for these modulations in the sad face, significant  
18 Granger causality matrix patterns in the sad face and neutral face were similar. Detailed  
19 information of all statistical results is provided in the supplementary materials.

20

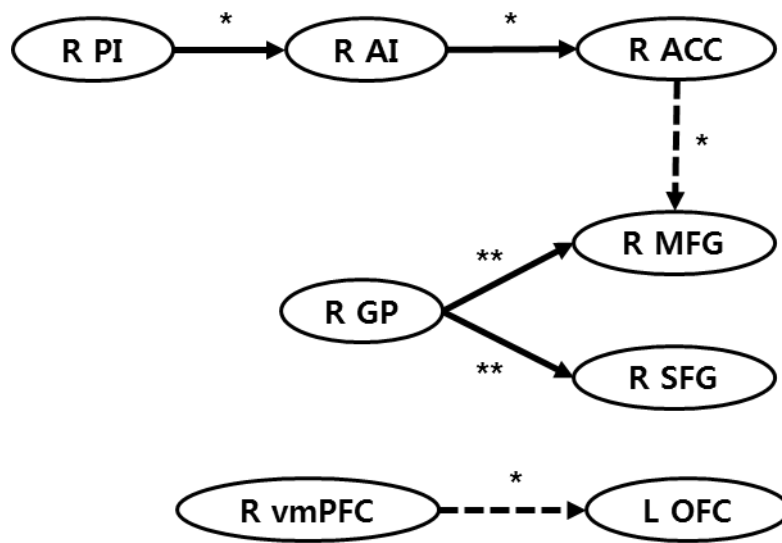

1

2 **Figure 4. Enhanced bottom up interoceptive information processing in sad face**  
3 **perception (solid arrow: significantly enhanced Granger causality in sad face > neutral**  
4 **face, dashed arrow: significantly decreased Granger causality, \* p < 0.05, \*\* p < 0.01; the**  
5 **value of the Granger causality above is the difference between the averaged Granger**  
6 **causality of each condition)**

7

## 8 **Analysis of physiological data**

### 9 **Heart rate and ECG R peak amplitude modulation in each condition**

10 To determine whether the effect of the different HEP amplitude originated from different heart-  
11 related physiological statuses, the heart rate and ECG R peak amplitude were compared  
12 between the conditions using one-way RANOVA. There were no significant differences  
13 between conditions in either heart rate ( $F(1.516, 46.982) = 2.367, p = 0.118$ , Greenhouse-  
14 Geisser corrected) or heartbeat amplitude ( $F(2.989, 92.658) = 0.958, p = 0.416$ , Greenhouse-  
15 Geisser corrected).

### 16 **Heartbeat distribution in each condition**

1 To rule out the possibility that our significant HEP modulation effect resulted from the fact that  
2 the heartbeat appeared more or less in a specific time window of visual evoked cortical  
3 processing, distribution of heartbeat occurrences within each time window of visual processing  
4 was analyzed. Two-way 6\*9 RANOVA (six condition and nine 100ms time bins (-200ms from  
5 700ms to visual stimulus onset)) showed neither a different occurrence rate of heartbeat among  
6 the conditions ( $F(3.810, 118.111) = 0.783, p = 0.533$ , Greenhouse-Geisser corrected) nor  
7 among time bins ( $F(4.876, 151.143) = 1.540, p = 0.182$ , Greenhouse-Geisser corrected).

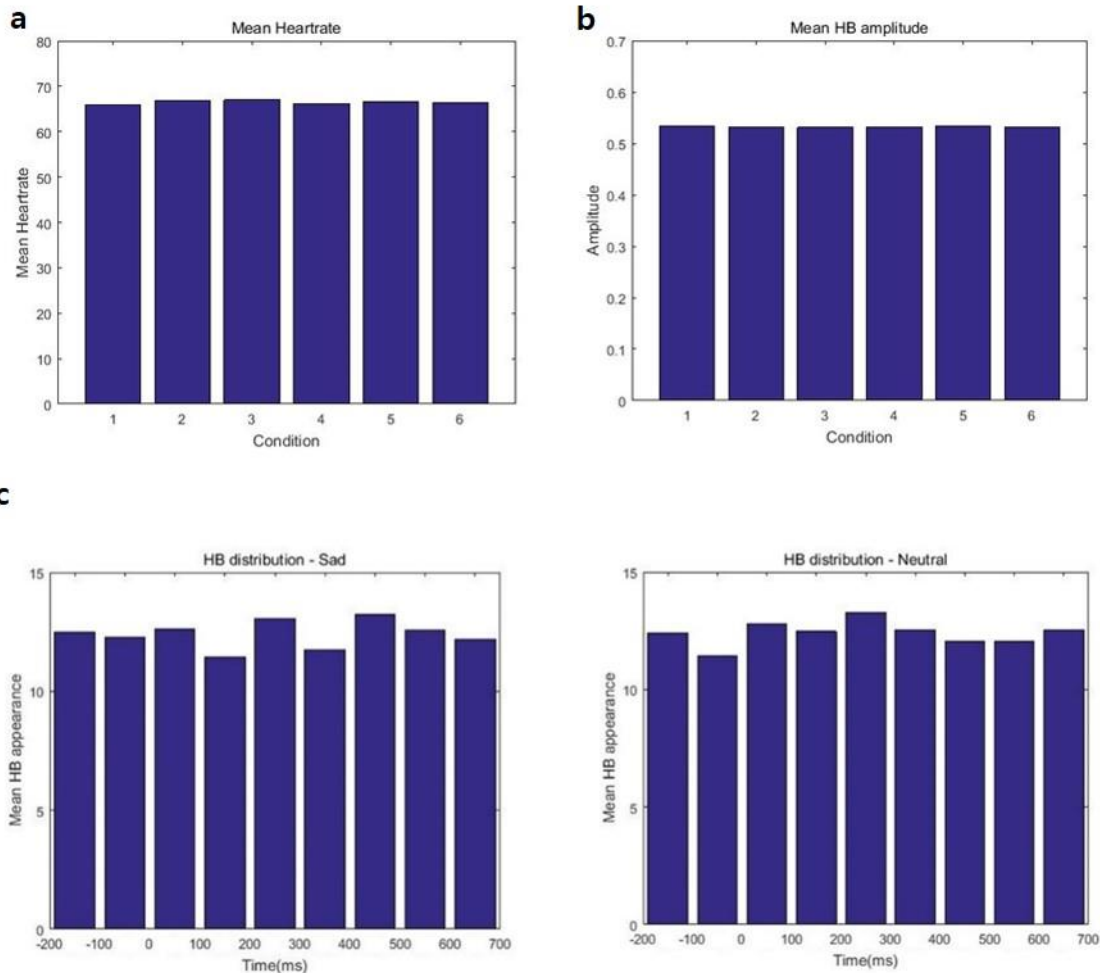

8

9 **Figure 5. Physiological data analysis results - a. mean heartrate of six experimental**  
10 **conditions b. mean R peak amplitude of six experimental conditions, c. mean R peak**  
11 **occurrence distribution in epoch of sad face (left) and neutral face (right)**

1 **Analysis to exclude the effect of visual processing**

2 **Surrogate R peak analysis on HEP modulation effect of a sad face**

3 One hundred surrogate R peaks were made to make random epochs that were independent of a  
4 heartbeat. Then, the maximum summed cluster t statistics of the difference between sad and  
5 neutral faces was calculated and used to make a permutation distribution. Our HEP modulation  
6 effect size (maximum cluster t statistics) was significant in that the distribution (Monte-Carlo  
7  $p < 0.03$ ) meant that our effect was highly likely to be locked to the heartbeat.

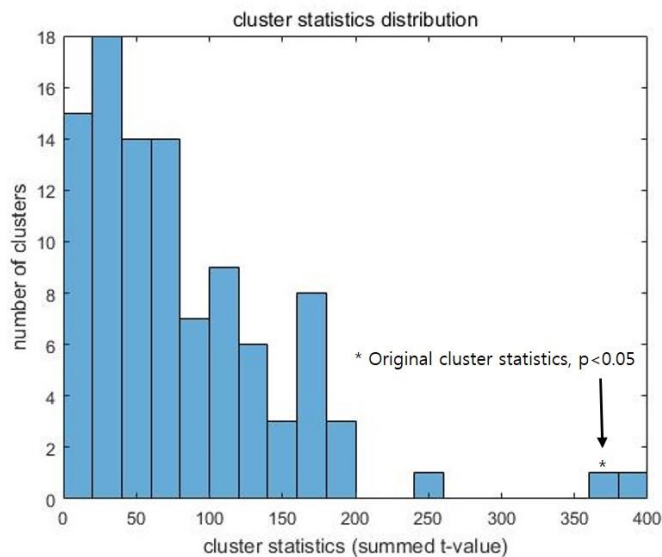

9

10 **Figure 6. The surrogate R peak histogram (absolute cluster statistics), \* represents the**  
11 **location of the original cluster statistic of the HEP modulation effect in a sad face**

12

13 **Different spatial pattern between visual evoked potential analysis (VEP) results and HEP**  
14 **analysis results in sad face perception**

15 Finally, to exclude the possibility that HEP modulation was confounded by neural activity  
16 reflecting visual processing, we analyzed visualevoked potential data with a cluster based

1 permutation t-test. Two significant clusters at 73ms-198ms (Monte-Carlo  $p = 0.05$ ) and 815ms-  
2 948ms (Monte-Carlo  $p = 0.004$ ) after stimulus were found. However, their topological  
3 distribution was totally different from the HEP effect. Furthermore, in the source analysis of  
4 VEP (which was performed with the same method as the HEP source analysis), two clusters,  
5 which included the right ventromedial prefrontal cortex cluster and right cuneus cluster, were  
6 found at 73ms-198ms (cluster-forming threshold = 0.01, minimum number of adjacent  
7 significant voxels = 10, cluster level  $p$ -value < 0.001 in both clusters). Two clusters were also  
8 found in the 815ms-948ms time window, which included the left cuneus cluster and the right  
9 cuneus cluster ( $p < 0.001$ ,  $p = 0.042$  each with the same cluster definition of the earlier cluster).  
10 Finally, in the paired t-test of absolute time courses, the right fusiform/middle temporal gyrus  
11 cluster (cluster level  $p < 0.001$ ) and the right angular gyrus/superior temporal gyrus cluster  
12 (cluster level  $p = 0.043$ , FWE corrected) were more activated in the sad face of the 73ms-198ms  
13 window, while a supplementary motor area cluster (cluster level  $p$ -value = 0.003, FWE  
14 corrected) was found in the late time window (815ms-948ms). Detailed information on the  
15 absolute time courses, including statistical information, is provided in the supplementary  
16 materials.

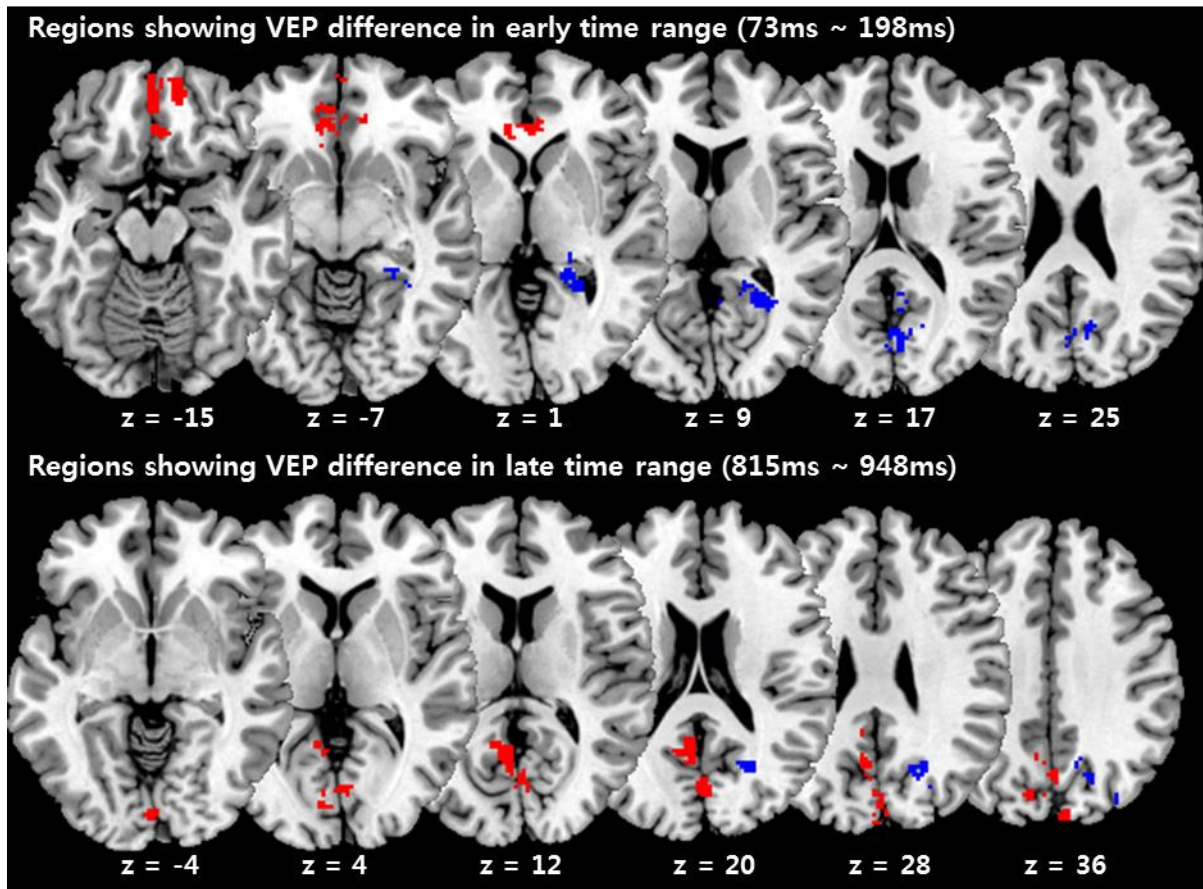

1

2 **Figure 7. Regions showing significantly different VEP for a sad face compared to a neutral**  
3 **face (upper: 73ms-198ms, lower: 815ms-948ms)**

4

5

6

7

8

9

10



1 **Table 2. Regions showing significantly different VEP for a sad face compared to a neutral**  
 2 **face (73ms-198ms, 815ms-948ms)**

| <b>Cluster</b><br><b>(73ms-198ms)</b>       | <b>Region</b>               | <b>MNI</b><br><b>coordinate</b> | <b>Cluster size</b><br><b>(voxel</b><br><b>number)</b> | <b>F value</b> | <b>Cluster P</b><br><b>value (FWE</b><br><b>corrected)</b> |
|---------------------------------------------|-----------------------------|---------------------------------|--------------------------------------------------------|----------------|------------------------------------------------------------|
| <b>Cluster 1 (Red)</b>                      | Rt superior orbital gyrus   | 11 56 -17                       | 576                                                    | 18.18          | <0.001                                                     |
|                                             | Rt medial orbital gyrus     | 11 36 -10                       |                                                        | 15.59          |                                                            |
|                                             | Lt gyrus rectus             | -1 50 -15                       |                                                        | 14.65          |                                                            |
| <b>Cluster 2 (Blue)</b><br><b>Rt Cuneus</b> | Rt cuneus                   | 3 -73 18                        | 465                                                    | 18.17          | <0.001                                                     |
|                                             | Rt cuneus                   | 11 -68 26                       |                                                        | 14.48          |                                                            |
|                                             | Rt calcarine sulcus         | 23 -48 6                        |                                                        | 14.18          |                                                            |
| <b>Cluster</b><br><b>(815ms-948ms)</b>      | <b>Region</b>               | <b>MNI</b><br><b>coordinate</b> | <b>Cluster size</b><br><b>(voxel</b><br><b>number)</b> | <b>F value</b> | <b>Cluster P</b><br><b>value (FWE</b><br><b>corrected)</b> |
| <b>Cluster 1 (Red)</b>                      | Lt calcarine sulcus         | -3 -62 14                       | 836                                                    | 33.02          | <0.001                                                     |
|                                             | Lt cuneus                   | -1 -73 20                       |                                                        | 25.06          |                                                            |
|                                             | Lt calcarine sulcus         | -1 -87 -4                       |                                                        | 23.78          |                                                            |
| <b>Cluster 2 (Blue)</b><br><b>Rt Cuneus</b> | Rt cuneus                   | 23 -68 24                       | 199                                                    | 20.46          | 0.042                                                      |
|                                             | Rt superior occipital gyrus | 28 -78 34                       |                                                        | 15.89          |                                                            |
|                                             | Rt superior occipital gyrus | 23 -73 30                       |                                                        | 12.15          |                                                            |

3 **(voxel size: 1mm x 1mm x 1mm)**

## 1 **Discussion**

2 Our findings provide direct and strong evidence that perception of a sad face modulates the  
3 interoceptive information processing in the cortex.

4 First, we showed that cortical heartbeat processing after presentation of a sad face has  
5 significantly different spatiotemporal dynamics compared with a neutral face and these  
6 differences are localized in the interoceptive network (AI, ACC, vmPFC), basal ganglia (GP,  
7 Putamen) and prefrontal areas (MFG, SFG). Importantly, results of the Granger causality  
8 analysis of these regions showed that bottom up heartbeat information processing from RPI to  
9 RAI to RACC were increased. In contrast to the HEP results, visual – locked activity was  
10 different in the bilateral visual information processing area including the bilateral cuneus,  
11 fusiform face area and other areas including the ventromedial prefrontal cortex and  
12 supplementary motor area. Interestingly, the only region that overlapped between the HEP and  
13 VEP were vmPFC – which is a key region in somatic marker hypothesis. Finally, surrogate R  
14 peak analysis provided strong evidence that our result is a consequence of cortical heartbeat  
15 processing modulation. Additionally, analysis of physiological data and cardiac artifact  
16 removal using ICA also ruled out the possibility of an effect of other physiological effects on  
17 the cortical signal.

18 Our results go beyond previous studies of interoception and emotion in several aspects.

19 The result of our sensor analysis showed that a sad face evoked a different spatiotemporal  
20 pattern of HEP in the right frontal and central sensors at a time window centered about 500ms  
21 after the R peak, which was different from the pattern for a neutral face. Two recent studies  
22 with electroencephalography (EEG) have reported the HEP modulation by emotional stimuli.  
23 One study using visual and auditory stimuli showed the HEP modulation by high-arousal mood

1 induction in left parietal clusters at 305 to 360ms after the R peak and the right temporoparietal  
2 cluster at 380 to 460ms after the R peak (Luft & Bhattacharya, 2015). They summed both  
3 positive and negative emotional valence conditions to show arousal effect. The other recent  
4 EEG study in 5 month old infants reported that a video clip of an angry or fearful face increases  
5 HEP at 150 to 300ms after R peak in the frontal cluster (Maister, Tang, & Tsakiris, 2017). While  
6 both happy and sad stimuli are low-arousal emotions (Liu, Chen, Hsieh, & Chen, 2015), the  
7 second study neither showed the significant cluster in the contrast of happiness vs. neutral  
8 conditions nor applied sad stimuli. Thus, the HEP modulation by emotional stimuli reported in  
9 two recent studies reflect the effect by emotional arousal more likely than conceptualizing  
10 process. In addition, both studies did not demonstrate underlying neural mechanism of this  
11 modulation effect based on source analysis. Considering that the bodily signal not only need to  
12 be recognized in brain but also need to be conceptualized to make emotional feeling (Smith &  
13 Lane, 2015), we insist that our result reflects the conceptualization process of interoceptive  
14 signals that are related to specific emotional feelings, but not just arousal which is related to  
15 early representation of bodily signal. First, a sad face used in this study is known to induce a  
16 relatively low arousal (Liu et al., 2015). Second, the spatiotemporal dynamics of our results are  
17 clearly different from the emotional arousal effect of Luft et al and Maister et al. In their study,  
18 HEP differences were shown in the parietal and temporal clusters before 460ms post R peak  
19 (Luft & Bhattacharya, 2015) and 150 to 300ms after R peak in the frontal ROI (Maister et al.,  
20 2017), whereas our results were found at the frontal and central sensors around 500ms post R  
21 peak (which is later than in the arousal effect). Third, anterior cingulate cortex is thought to be  
22 related to forming emotion concept based on whole body representation of insula (Smith &  
23 Lane, 2015) which is consistent with our results that have shown increased Granger causality  
24 from the insula to anterior cingulate cortex. Considering these aspects, our results are not likely  
25 to be caused only by emotional arousal and are likely to be related to later processing, which

1 we suggest is related to conceptualization and making of individual emotional feeling.  
2 Additionally, the topology of our result is similar to Shao et al. which showed that HEP  
3 suppression in the right frontal and central sensors is induced by pain (Shao et al, 2011, clinical  
4 neurophysiology). Contrary to a sad face, other emotional expressions, including a sad  
5 emoticon, happy face and happy emoticon, did not show a significant HEP modulation effect.  
6 In particular, a sad emoticon, which is also a sad emotional expression like a sad face, did not  
7 modulate HEP although the emotionality scores of a sad face and a sad emoticon were not  
8 different (in paired-t test,  $p = 0.492$ , mean emotionality score of sad emoticon = 2.81, mean  
9 emotionality score of sad face = 2.71). Considering that a text based emoticon is not an innately  
10 encoded stimulus like a face, responses to sad emoticons are more likely to be influenced by  
11 experiences with sad emoticons or emotional experience associated with sad emoticons, which  
12 are different from sad faces. Therefore, we suspected that a sad emoticon would have induced  
13 a more variable intensity of feeling across subjects and thus a more variable size of the HEP  
14 modulation effect, which might have caused a statistically insignificant modulation effect,  
15 while some people who are susceptible to sad emoticons might have exhibited HEP modulation  
16 effect by a sad emoticon. In accordance with this explanation, our participants showed a more  
17 heterogeneous response toward sad emoticons than toward sad faces. Variance of mean  
18 emotionality score in the sad emoticon across subjects was 0.85, which is much larger than the  
19 variance of the sad face (0.31).

20 In source analysis of HEP and VEP modulation by a sad face, we found that there are two  
21 clearly distinct systems of processing, cardiac information processing and visual information  
22 processing. First, brain regions that reflect HEP modulation in sensor analysis were found in  
23 RAI and RACC, which is a previously known source of HEP (Couto et al., 2015; H.-D. Park  
24 et al., 2017; H.-D. Park et al., 2014; Pollatos, Kirsch, & Schandry, 2005). These regions are

1 also identified as an overlapping region of emotion, interoception and social cognition in a  
2 recent meta-analysis (Adolfi et al., 2016). Moreover, a Granger causality analysis revealed that  
3 cardiac information flow from RPI to RAI to RACC increases with sad face perception.  
4 Interoceptive sensory information is primarily represented in the posterior insula (Barrett &  
5 Simmons, 2015; Craig & Craig, 2009) and this interoceptive information is relayed and  
6 integrated into the anterior insula to form conscious emotional concept – feeling (A. Damasio  
7 & Carvalho, 2013; Smith & Lane, 2015). Moreover, the anterior insula interacts with many  
8 regions, including the ACC, which is a central autonomic network (CAN) that regulates  
9 autonomic function (Beissner, Meissner, Bär, & Napadow, 2013). These previous studies make  
10 it clear that bottom-up cardiac information flow is increased in sad face perception. However,  
11 according to the the source analysis of VEP, only the visual cortical region and ventromedial  
12 prefrontal regions appeared, which is consistent with previous EEG/MEG studies of sad faces  
13 (Batty & Taylor, 2003; Esslen, Pascual-Marqui, Hell, Kochi, & Lehmann, 2004). By integrating  
14 these results, we firmly insist that processing of sad faces involves distinct interoceptive  
15 processing and visual processing and this is revealed by the HEP and VEP after the stimulus.  
16 To our knowledge, this is the first study that has shown distinctive processing of both systems  
17 of processing induced for sad faces in a clear and direct way. These results well correspond to  
18 hypotheses that explain the relationship between emotion and interoception like the somatic  
19 marker hypothesis (A. R. Damasio, 2003), which predicts that bottom up interoceptive  
20 processing would be increased by emotional stimulus. The somatic marker hypothesis predicts  
21 that physiological change would be induced by emotional stimulus and modulates brain-body  
22 interaction while the result of our physiological data analysis showed that cardiac activity  
23 parameters, including heartrate and heartbeat amplitude, were not modulated in the sad face.  
24 However, considering that direct input of the HEP is pressure in the carotid baroreceptor and  
25 that we did not measure blood pressure or index of carotid stimulation, it is hard to tell whether

1 there was no physiological change. Another possibility is that absence of induced physiological  
2 change might be due to our short stimulus onset asynchrony of about 1 second, in which it is  
3 hard to evaluate physiological changes like heart rate modulation, which occurs after several  
4 seconds (Critchley et al., 2005). Note that, our results derived from sad emotion among  
5 negative ones. Therefore, future experiments are needed to be performed with other negative  
6 emotional stimuli such as fear or anger.

7 What is the unexpected and surprising result is that cardiac information processing in the basal  
8 ganglia (RGP/RP) and prefrontal regions (SFG/MFG) is also modulated. Moreover, Granger  
9 causality analysis revealed that information flow from GP to SFG/MFG is increased. Globus  
10 pallidus is known to send input to the prefrontal cortex via the thalamus. This pathway is related  
11 to initiating motor action (Singh-Bains, Waldvogel, & Faull, 2016). In particular, the ventral  
12 pallidum (VP) is closely related to regulating emotion or starting motor action in response to  
13 emotional stimuli (Singh-Bains et al., 2016). Moreover, there was a case of a patient with  
14 damage of the GP, including the VP, who reported inability to feel emotion (Vijayaraghavan,  
15 Vaidya, Humphreys, Beglinger, & Paradiso, 2008). Based on this evidence, we suggest that  
16 cardiac information is relayed to the GP (including VP), and finally, the prefrontal area has a  
17 role in initiating emotion-related behavior like facial expression or generation of feeling  
18 triggered by cardiac information processing, which is consistent with the somatic marker  
19 hypothesis. In particular, we think that information from the GP to the SFG (corresponding to  
20 the dmPFC) is more likely to be involved in the generation of feeling and information from the  
21 GP to the MFG (which corresponds to the dlPFC) and is more likely to be involved in motor  
22 action. To our knowledge, these results, especially the HEP modulation in the basal ganglia, is  
23 the first evidence that cardiac information is processed in the basal ganglia and modulated in  
24 sad face perception.

1 Finally, cardiac information flow from the RACC to the RMFG was decreased in sad face  
2 processing in Granger causality analysis results. The RACC, which is related not only to  
3 interoception but also to the saliency network, which processes saliency of the stimuli and  
4 converts the result between the default mode network (DMN) and the central executive network  
5 (CEN) (Goulden et al., 2014; Seeley et al., 2007). Considering that the RMFG, which  
6 corresponds to the dIPFC, is the core of the CEN, we suspect that decreased cardiac information  
7 flow from the RACC to the RMFG and increased information from the RPI to RAI to the  
8 RACC means increased conversion to the CEN and to the DMN. This is also supported by a  
9 recent study that showed that HEP processing is closely related to the DMN (Babo-Rebelo et  
10 al., 2016). Furthermore, this might be related to the cognitive decline in people with  
11 depression (Rock, Roiser, Riedel, & Blackwell, 2014).

12 To our knowledge, this is the first study to show different interoceptive and visual processing  
13 by the same emotional stimulus. In conclusion, our results demonstrate that processing of sad  
14 faces induces both different interoceptive information processing and visual processing  
15 compared to neutral faces, which is reflected by the HEP and VEP, respectively. Interoceptive  
16 processing involves increased bottom-up processing of the HEP from the RPI to the RAI to the  
17 RACC, while different visual processing occurs in a different area, including the visual cortical  
18 area. Additionally, we found that cardiac signals are also processed differently in the basal  
19 ganglia and prefrontal regions, and effective connectivity from the GP to the PFC is also  
20 modulated in sad face processing. We suggest that this increased connectivity reflects initiation  
21 of emotion-related behavior like facial expression or generation of feeling. Finally, RACC to  
22 RMFG connectivity, which is likely to reflect switching from the DMN to the CEN by the  
23 saliency network, was decreased.

24

## 1 **Acknowledgement**

2 This research was supported by the Brain Research Program through the National Research F  
3 oundation of Korea (NRF) funded by the Ministry of Science & ICT (NRF -  
4 2016M3C7A1914448 NRF - 2017M3C7A1031331). The authors wish to acknowledge Kyung  
5 -Min An and Yong-Ho Lee for helping data acquisition.

6

## 7 **References**

- 8 Adolphi, F., Couto, B., Richter, F., Decety, J., Lopez, J., Sigman, M., . . . Ibáñez, A. (2016). Convergence  
9 of interoception, emotion, and social cognition: A twofold fMRI meta-analysis and lesion  
10 approach. *Cortex*.
- 11 Attal, Y., & Schwartz, D. (2013). Assessment of subcortical source localization using deep brain  
12 activity imaging model with minimum norm operators: a MEG study. *PLoS One*, *8*(3), e59856.
- 13 Babo-Rebelo, M., Richter, C. G., & Tallon-Baudry, C. (2016). Neural responses to heartbeats in the  
14 default network encode the self in spontaneous thoughts. *Journal of Neuroscience*, *36*(30),  
15 7829-7840.
- 16 Barnett, L., & Seth, A. K. (2014). The MVGC multivariate Granger causality toolbox: a new approach  
17 to Granger-causal inference. *Journal of neuroscience methods*, *223*, 50-68.
- 18 Barrett, L. F., & Simmons, W. K. (2015). Interoceptive predictions in the brain. *Nature reviews*  
19 *neuroscience*, *16*(7), 419-429.
- 20 Batty, M., & Taylor, M. J. (2003). Early processing of the six basic facial emotional expressions.  
21 *Cognitive Brain Research*, *17*(3), 613-620.
- 22 Beissner, F., Meissner, K., Bär, K.-J., & Napadow, V. (2013). The autonomic brain: an activation  
23 likelihood estimation meta-analysis for central processing of autonomic function. *Journal of*  
24 *Neuroscience*, *33*(25), 10503-10511.
- 25 Citron, F. M., Gray, M. A., Critchley, H. D., Weekes, B. S., & Ferstl, E. C. (2014). Emotional valence and  
26 arousal affect reading in an interactive way: neuroimaging evidence for an approach-  
27 withdrawal framework. *Neuropsychologia*, *56*, 79-89.
- 28 Couto, B., Adolphi, F., Velasquez, M., Mesow, M., Feinstein, J., Canales-Johnson, A., . . . Sigman, M.  
29 (2015). Heart evoked potential triggers brain responses to natural affective scenes: a  
30 preliminary study. *Autonomic Neuroscience*, *193*, 132-137.
- 31 Craig, A. D., & Craig, A. (2009). How do you feel--now? The anterior insula and human awareness.  
32 *Nature reviews neuroscience*, *10*(1).
- 33 Critchley, H. D., Rotshtein, P., Nagai, Y., O'doherty, J., Mathias, C. J., & Dolan, R. J. (2005). Activity in



- 1 the human brain predicting differential heart rate responses to emotional facial expressions.  
2 *Neuroimage*, 24(3), 751-762.
- 3 Damasio, A., & Carvalho, G. B. (2013). The nature of feelings: evolutionary and neurobiological  
4 origins. *Nature reviews neuroscience*, 14(2), 143-152.
- 5 Damasio, A. R. (2003). *Looking for Spinoza: Joy, sorrow, and the feeling brain*: Houghton Mifflin  
6 Harcourt.
- 7 Damasio, A. R., Grabowski, T. J., Bechara, A., Damasio, H., Ponto, L. L., Parvizi, J., & Hichwa, R. D.  
8 (2000). Subcortical and cortical brain activity during the feeling of self-generated emotions.  
9 *Nature neuroscience*, 3(10), 1049-1056.
- 10 Eckberg, D. L., & Sleight, P. (1992). *Human baroreflexes in health and disease*: Oxford University  
11 Press.
- 12 Esslen, M., Pascual-Marqui, R., Hell, D., Kochi, K., & Lehmann, D. (2004). Brain areas and time course  
13 of emotional processing. *Neuroimage*, 21(4), 1189-1203.
- 14 Fischl, B. (2012). FreeSurfer. *Neuroimage*, 62(2), 774-781.
- 15 Fukushima, H., Terasawa, Y., & Umeda, S. (2011). Association between interoception and empathy:  
16 evidence from heartbeat-evoked brain potential. *International Journal of Psychophysiology*,  
17 79(2), 259-265.
- 18 Goulden, N., Khusnulina, A., Davis, N. J., Bracewell, R. M., Bokde, A. L., McNulty, J. P., & Mullins, P. G.  
19 (2014). The salience network is responsible for switching between the default mode network  
20 and the central executive network: replication from DCM. *Neuroimage*, 99, 180-190.
- 21 Granger, C. W. (1988). Some recent development in a concept of causality. *Journal of econometrics*,  
22 39(1-2), 199-211.
- 23 Hämäläinen, M., Hari, R., Ilmoniemi, R. J., Knuutila, J., & Lounasmaa, O. V. (1993).  
24 Magnetoencephalography—theory, instrumentation, and applications to noninvasive studies  
25 of the working human brain. *Reviews of modern Physics*, 65(2), 413.
- 26 Harrison, N. A., Gray, M. A., Gianaros, P. J., & Critchley, H. D. (2010). The embodiment of emotional  
27 feelings in the brain. *Journal of Neuroscience*, 30(38), 12878-12884.
- 28 James, W. (1884). What is an emotion? *Mind*, 9(34), 188-205.
- 29 Liu, T.-Y., Chen, Y.-S., Hsieh, J.-C., & Chen, L.-F. (2015). Asymmetric engagement of amygdala and its  
30 gamma connectivity in early emotional face processing. *PLoS One*, 10(1), e0115677.
- 31 Luft, C. D. B., & Bhattacharya, J. (2015). Aroused with heart: Modulation of heartbeat evoked potential  
32 by arousal induction and its oscillatory correlates. *Scientific reports*, 5.
- 33 Müller, L. E., Schulz, A., Andermann, M., Gäbel, A., Gescher, D. M., Spohn, A., . . . Bertsch, K. (2015).  
34 Cortical Representation of Afferent Bodily Signals in Borderline Personality Disorder: Neural  
35 Correlates and Relationship to Emotional Dysregulation. *JAMA psychiatry*, 72(11), 1077-1086.
- 36 Maister, L., Tang, T., & Tsakiris, M. (2017). Neurobehavioral evidence of interoceptive sensitivity in  
37 early infancy. *eLife*, 6.
- 38 Oostenveld, R., Fries, P., Maris, E., & Schoffelen, J.-M. (2011). FieldTrip: open source software for  
39 advanced analysis of MEG, EEG, and invasive electrophysiological data. *Computational*

- 1           *intelligence and neuroscience, 2011, 1.*
- 2 Pan, J., & Tompkins, W. J. (1985). A real-time QRS detection algorithm. *IEEE transactions on*  
3           *biomedical engineering(3)*, 230-236.
- 4 Park, H.-D., Bernasconi, F., Bello-Ruiz, J., Pfeiffer, C., Salomon, R., & Blanke, O. (2016). Transient  
5           Modulations of Neural Responses to Heartbeats Covary with Bodily Self-Consciousness.  
6           *Journal of Neuroscience, 36(32)*, 8453-8460.
- 7 Park, H.-D., Bernasconi, F., Salomon, R., Tallon-Baudry, C., Spinelli, L., Seeck, M., . . . Blanke, O. (2017).  
8           Neural Sources and Underlying Mechanisms of Neural Responses to Heartbeats, and their  
9           Role in Bodily Self-consciousness: An Intracranial EEG Study. *Cerebral Cortex, 1-14*.
- 10 Park, H.-D., Correia, S., Ducorps, A., & Tallon-Baudry, C. (2014). Spontaneous fluctuations in neural  
11           responses to heartbeats predict visual detection. *Nature neuroscience, 17(4)*, 612-618.
- 12 Park, J. Y., Oh, J. M., Kim, S. Y., Lee, M., Lee, C., Kim, B. R., & An, S. (2011). Korean facial expressions  
13           of emotion (KOFEE). *Seoul, Korea: Section of Affect & Neuroscience, Institute of Behavioral*  
14           *Science in Medicine, Yonsei University College of Medicine.*
- 15 Pollatos, O., Kirsch, W., & Schandry, R. (2005). Brain structures involved in interoceptive awareness  
16           and cardioafferent signal processing: a dipole source localization study. *Human brain*  
17           *mapping, 26(1)*, 54-64.
- 18 Pollatos, O., & Schandry, R. (2004). Accuracy of heartbeat perception is reflected in the amplitude  
19           of the heartbeat-evoked brain potential. *Psychophysiology, 41(3)*, 476-482.
- 20 Rock, P., Roiser, J., Riedel, W., & Blackwell, A. (2014). Cognitive impairment in depression: a systematic  
21           review and meta-analysis. *Psychological medicine, 44(10)*, 2029-2040.
- 22 Seeley, W. W., Menon, V., Schatzberg, A. F., Keller, J., Glover, G. H., Kenna, H., . . . Greicius, M. D. (2007).  
23           Dissociable intrinsic connectivity networks for salience processing and executive control.  
24           *Journal of Neuroscience, 27(9)*, 2349-2356.
- 25 Shao, S., Shen, K., Wilder-Smith, E. P., & Li, X. (2011). Effect of pain perception on the heartbeat  
26           evoked potential. *Clinical neurophysiology, 122(9)*, 1838-1845.
- 27 Simmons, W. K., Rapuano, K. M., Kallman, S. J., Ingeholm, J. E., Miller, B., Gotts, S. J., . . . Martin, A.  
28           (2013). Category-specific integration of homeostatic signals in caudal but not rostral human  
29           insula. *Nature neuroscience, 16(11)*, 1551-1552.
- 30 Singh-Bains, M. K., Waldvogel, H. J., & Faull, R. L. (2016). The role of the human globus pallidus in  
31           Huntington's disease. *Brain Pathology, 26(6)*, 741-751.
- 32 Smith, R., & Lane, R. D. (2015). The neural basis of one's own conscious and unconscious emotional  
33           states. *Neuroscience & Biobehavioral Reviews, 57*, 1-29.
- 34 Tadel, F., Baillet, S., Mosher, J. C., Pantazis, D., & Leahy, R. M. (2011). Brainstorm: a user-friendly  
35           application for MEG/EEG analysis. *Computational intelligence and neuroscience, 2011*, 8.
- 36 Terhaar, J., Viola, F. C., Bär, K.-J., & Debener, S. (2012). Heartbeat evoked potentials mirror altered  
37           body perception in depressed patients. *Clinical neurophysiology, 123(10)*, 1950-1957.
- 38 Vijayaraghavan, L., Vaidya, J. G., Humphreys, C. T., Beglinger, L. J., & Paradiso, S. (2008). Emotional  
39           and motivational changes after bilateral lesions of the globus pallidus. *Neuropsychology,*

1           22(3), 412.

2 Williams, L. M., Das, P., Liddell, B., Olivieri, G., Peduto, A., Brammer, M. J., & Gordon, E. (2005). BOLD,  
3           sweat and fears: fMRI and skin conductance distinguish facial fear signals. *Neuroreport*,  
4           16(1), 49-52.

5

6

7

8

9

10

11

12

13

14

15

16

17

18

19

20

21

22

23

24

25

26

27

28

29

30

31

## Experimental Paradigm

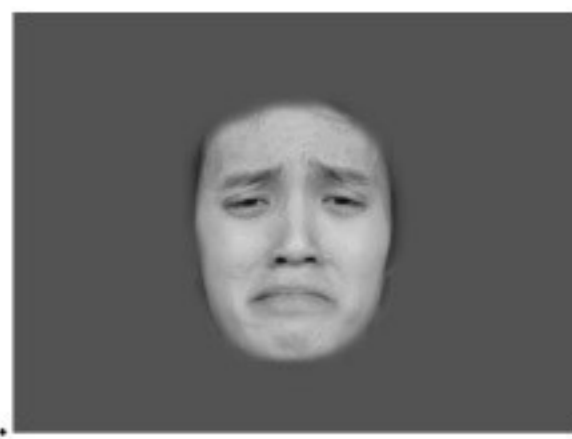

Stimulus (Sad face) 0.5s

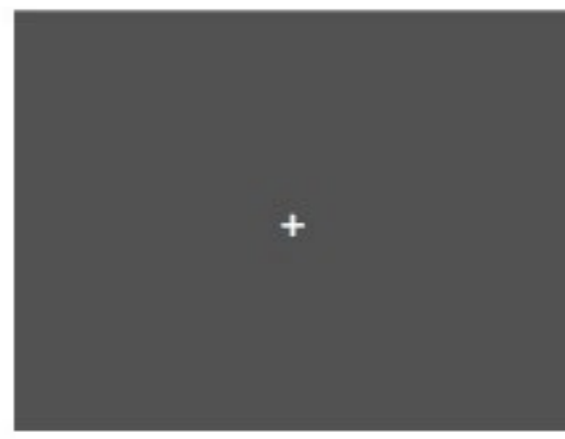

Fixation 1s

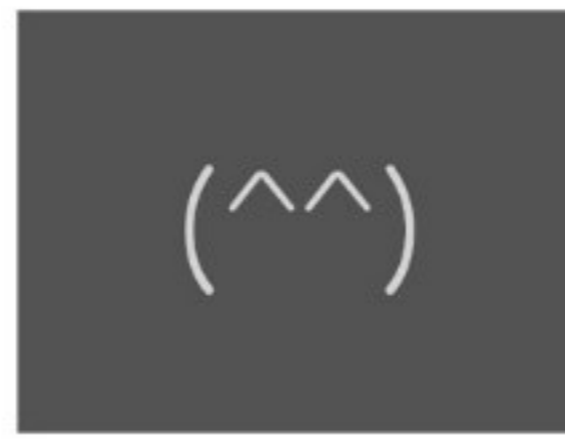

Stimulus (Happy emoticon) 0.5s

...

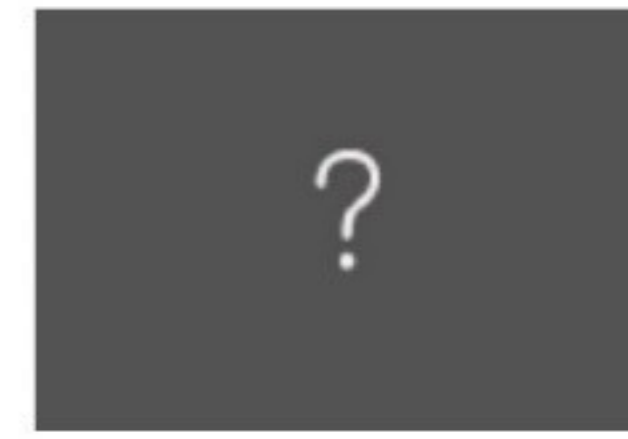

Response block (occurs randomly) 3s

30 stimuli per each conditions in one session, total of 4 sessions

### 1<sup>st</sup> Epoching (VEP)

(Blue box, -700ms ~ +1300ms from onset)

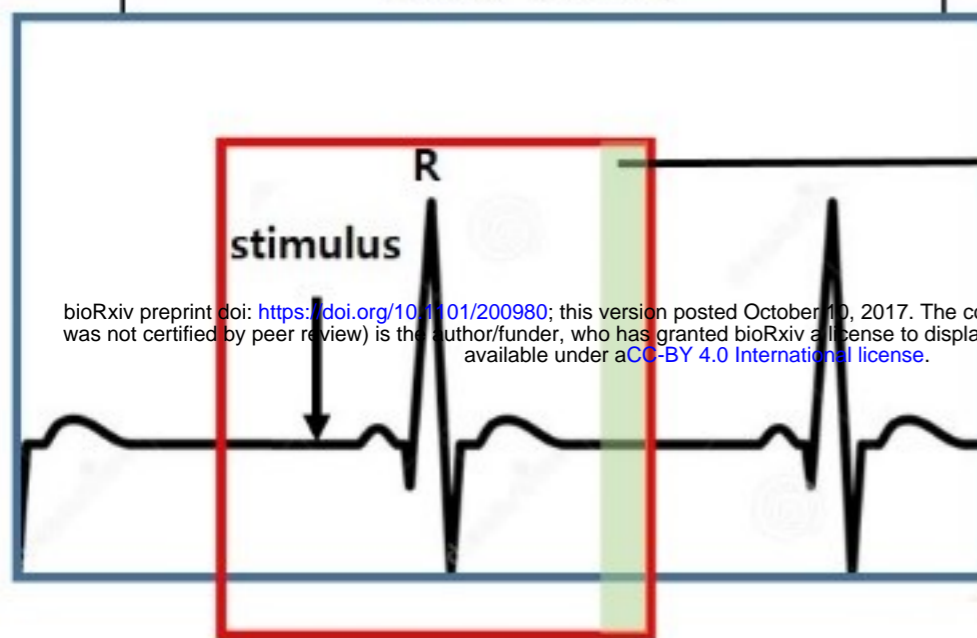

Cardiac artifact-free window  
(455ms ~ 595ms post R peak)

bioRxiv preprint doi: <https://doi.org/10.1101/200980>; this version posted October 10, 2017. The copyright holder for this preprint (which was not certified by peer review) is the author/funder, who has granted bioRxiv a license to display the preprint in perpetuity. It is made available under aCC-BY 4.0 International license.

### Preprocessing

Artifact rejection by visual inspection  
ICA correction of cardiac and eye component

### 2<sup>nd</sup> Epoching (HEP)

(Red box, -500ms ~ +600ms post R peak)

### Sensor level analysis

Cluster based permutation-t test between emotional and neutral condition (in cardiac artifact-free window)  
Extract statistically significant spatiotemporal cluster

### Source level analysis

Individual deep source modeling by Deep brain activity model and Subject T1 image data  
Localize source of results in sensor analysis using statistical test in SPM12  
Extract 12 ROI time courses (which have shown significant difference between conditions)

### Granger causality analysis

Calculate granger causality between 12 ROIs  
Calculate group-level significance of Granger causality using permutation test

### Validation of HEP effect

Surrogate R peak analysis of sensor analysis results  
Compare with visual evoked potential analysis results  
Physiological data analysis (Heart rate, Heartbeat amplitude..)

## Relationship between HEP and subjective feeling

HEP difference  
Sad – Neutral face (time = 500ms)

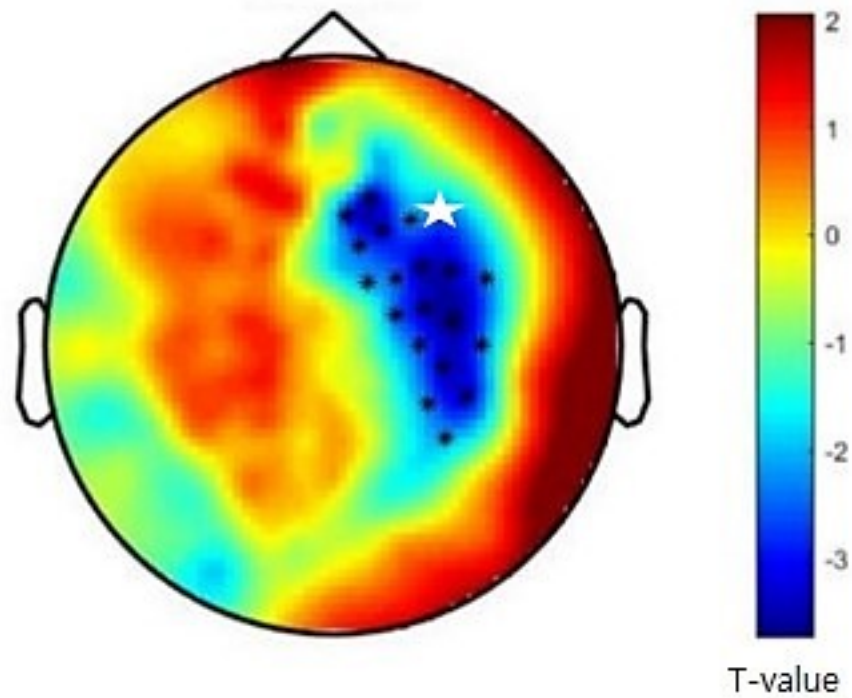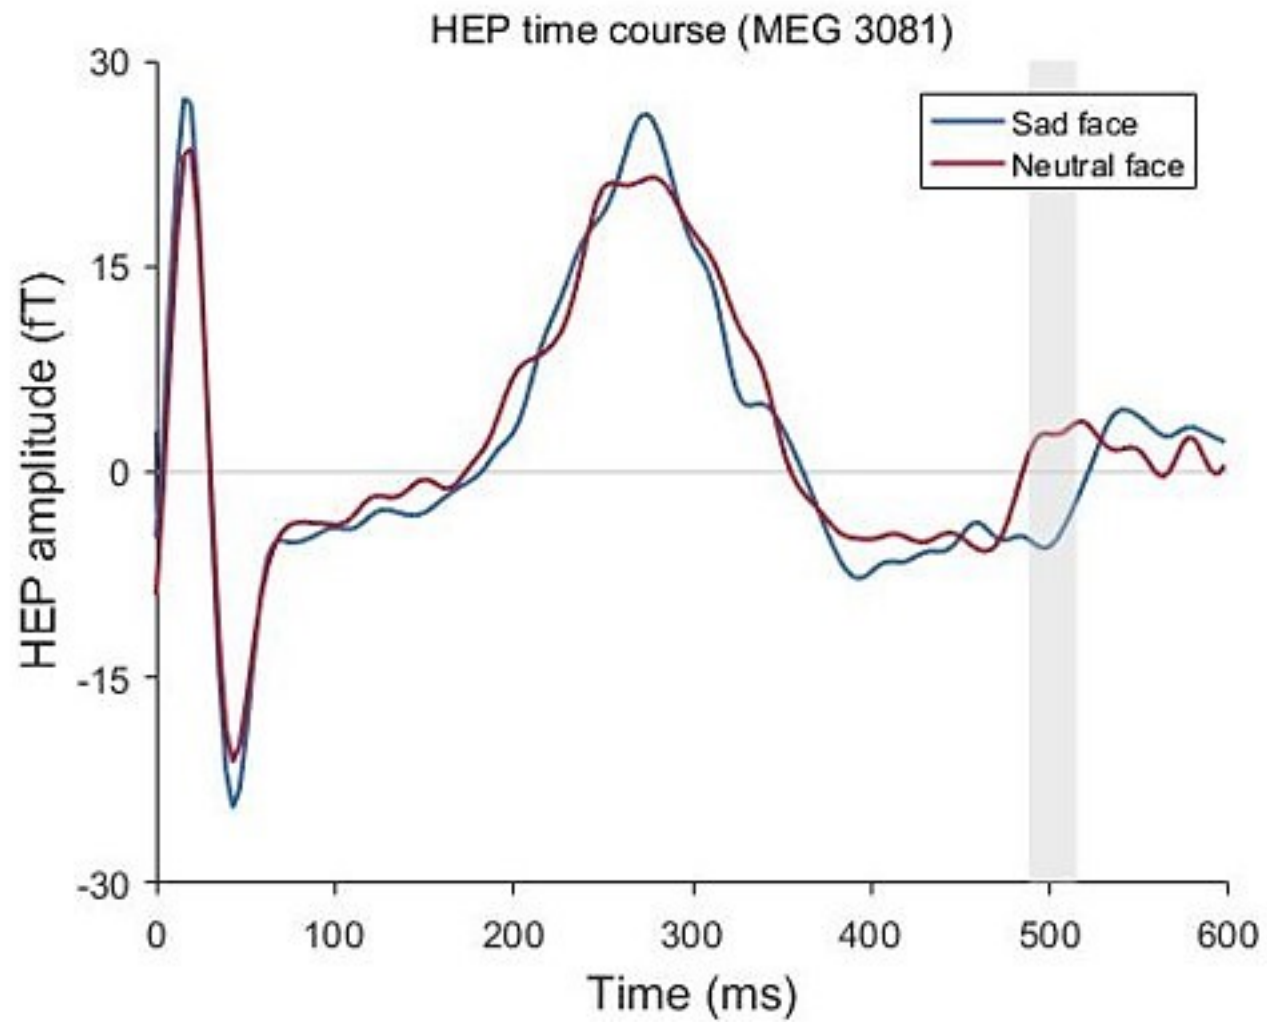

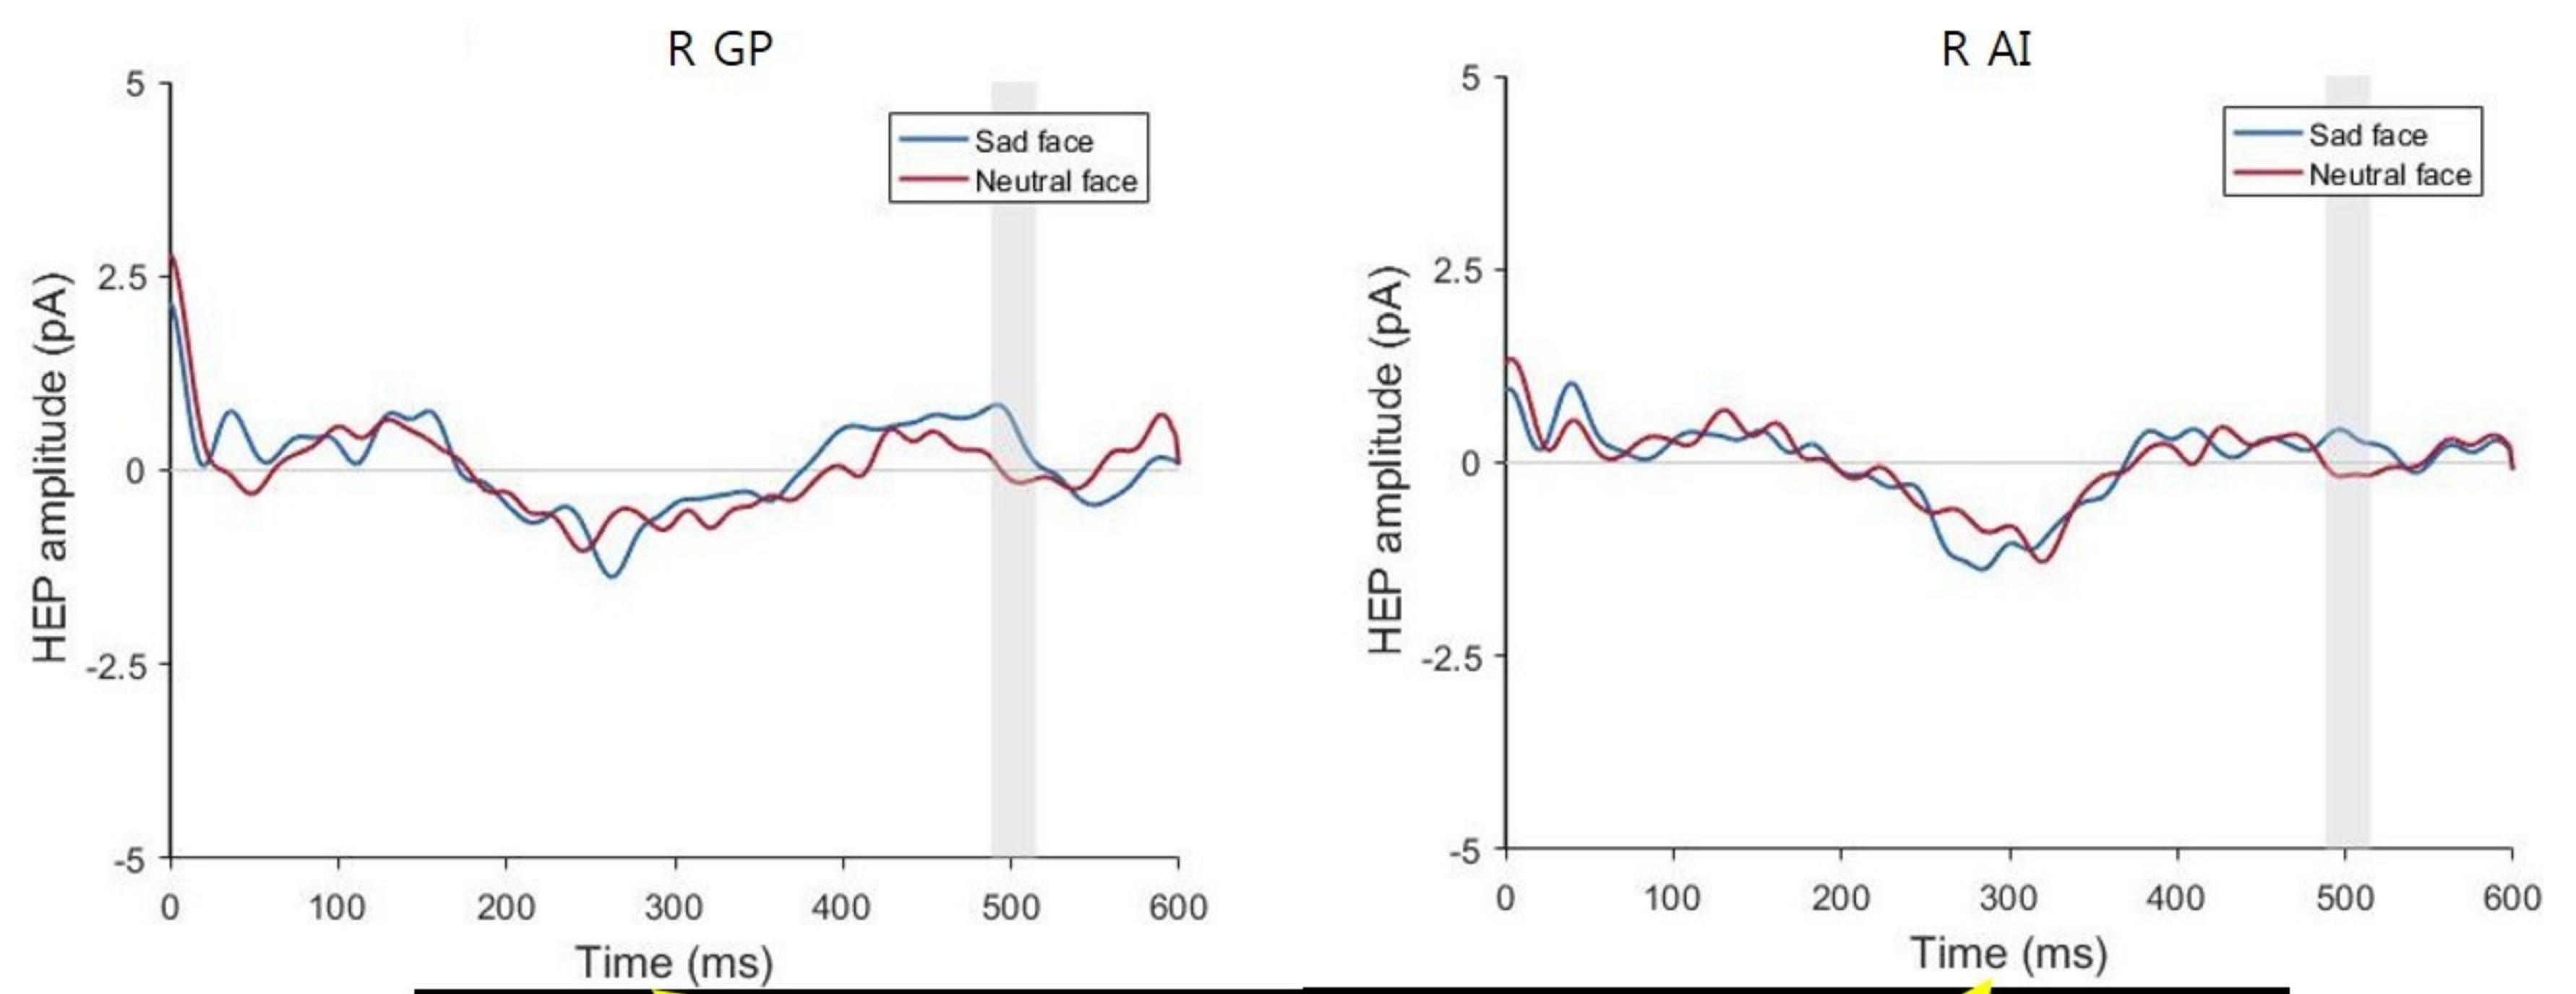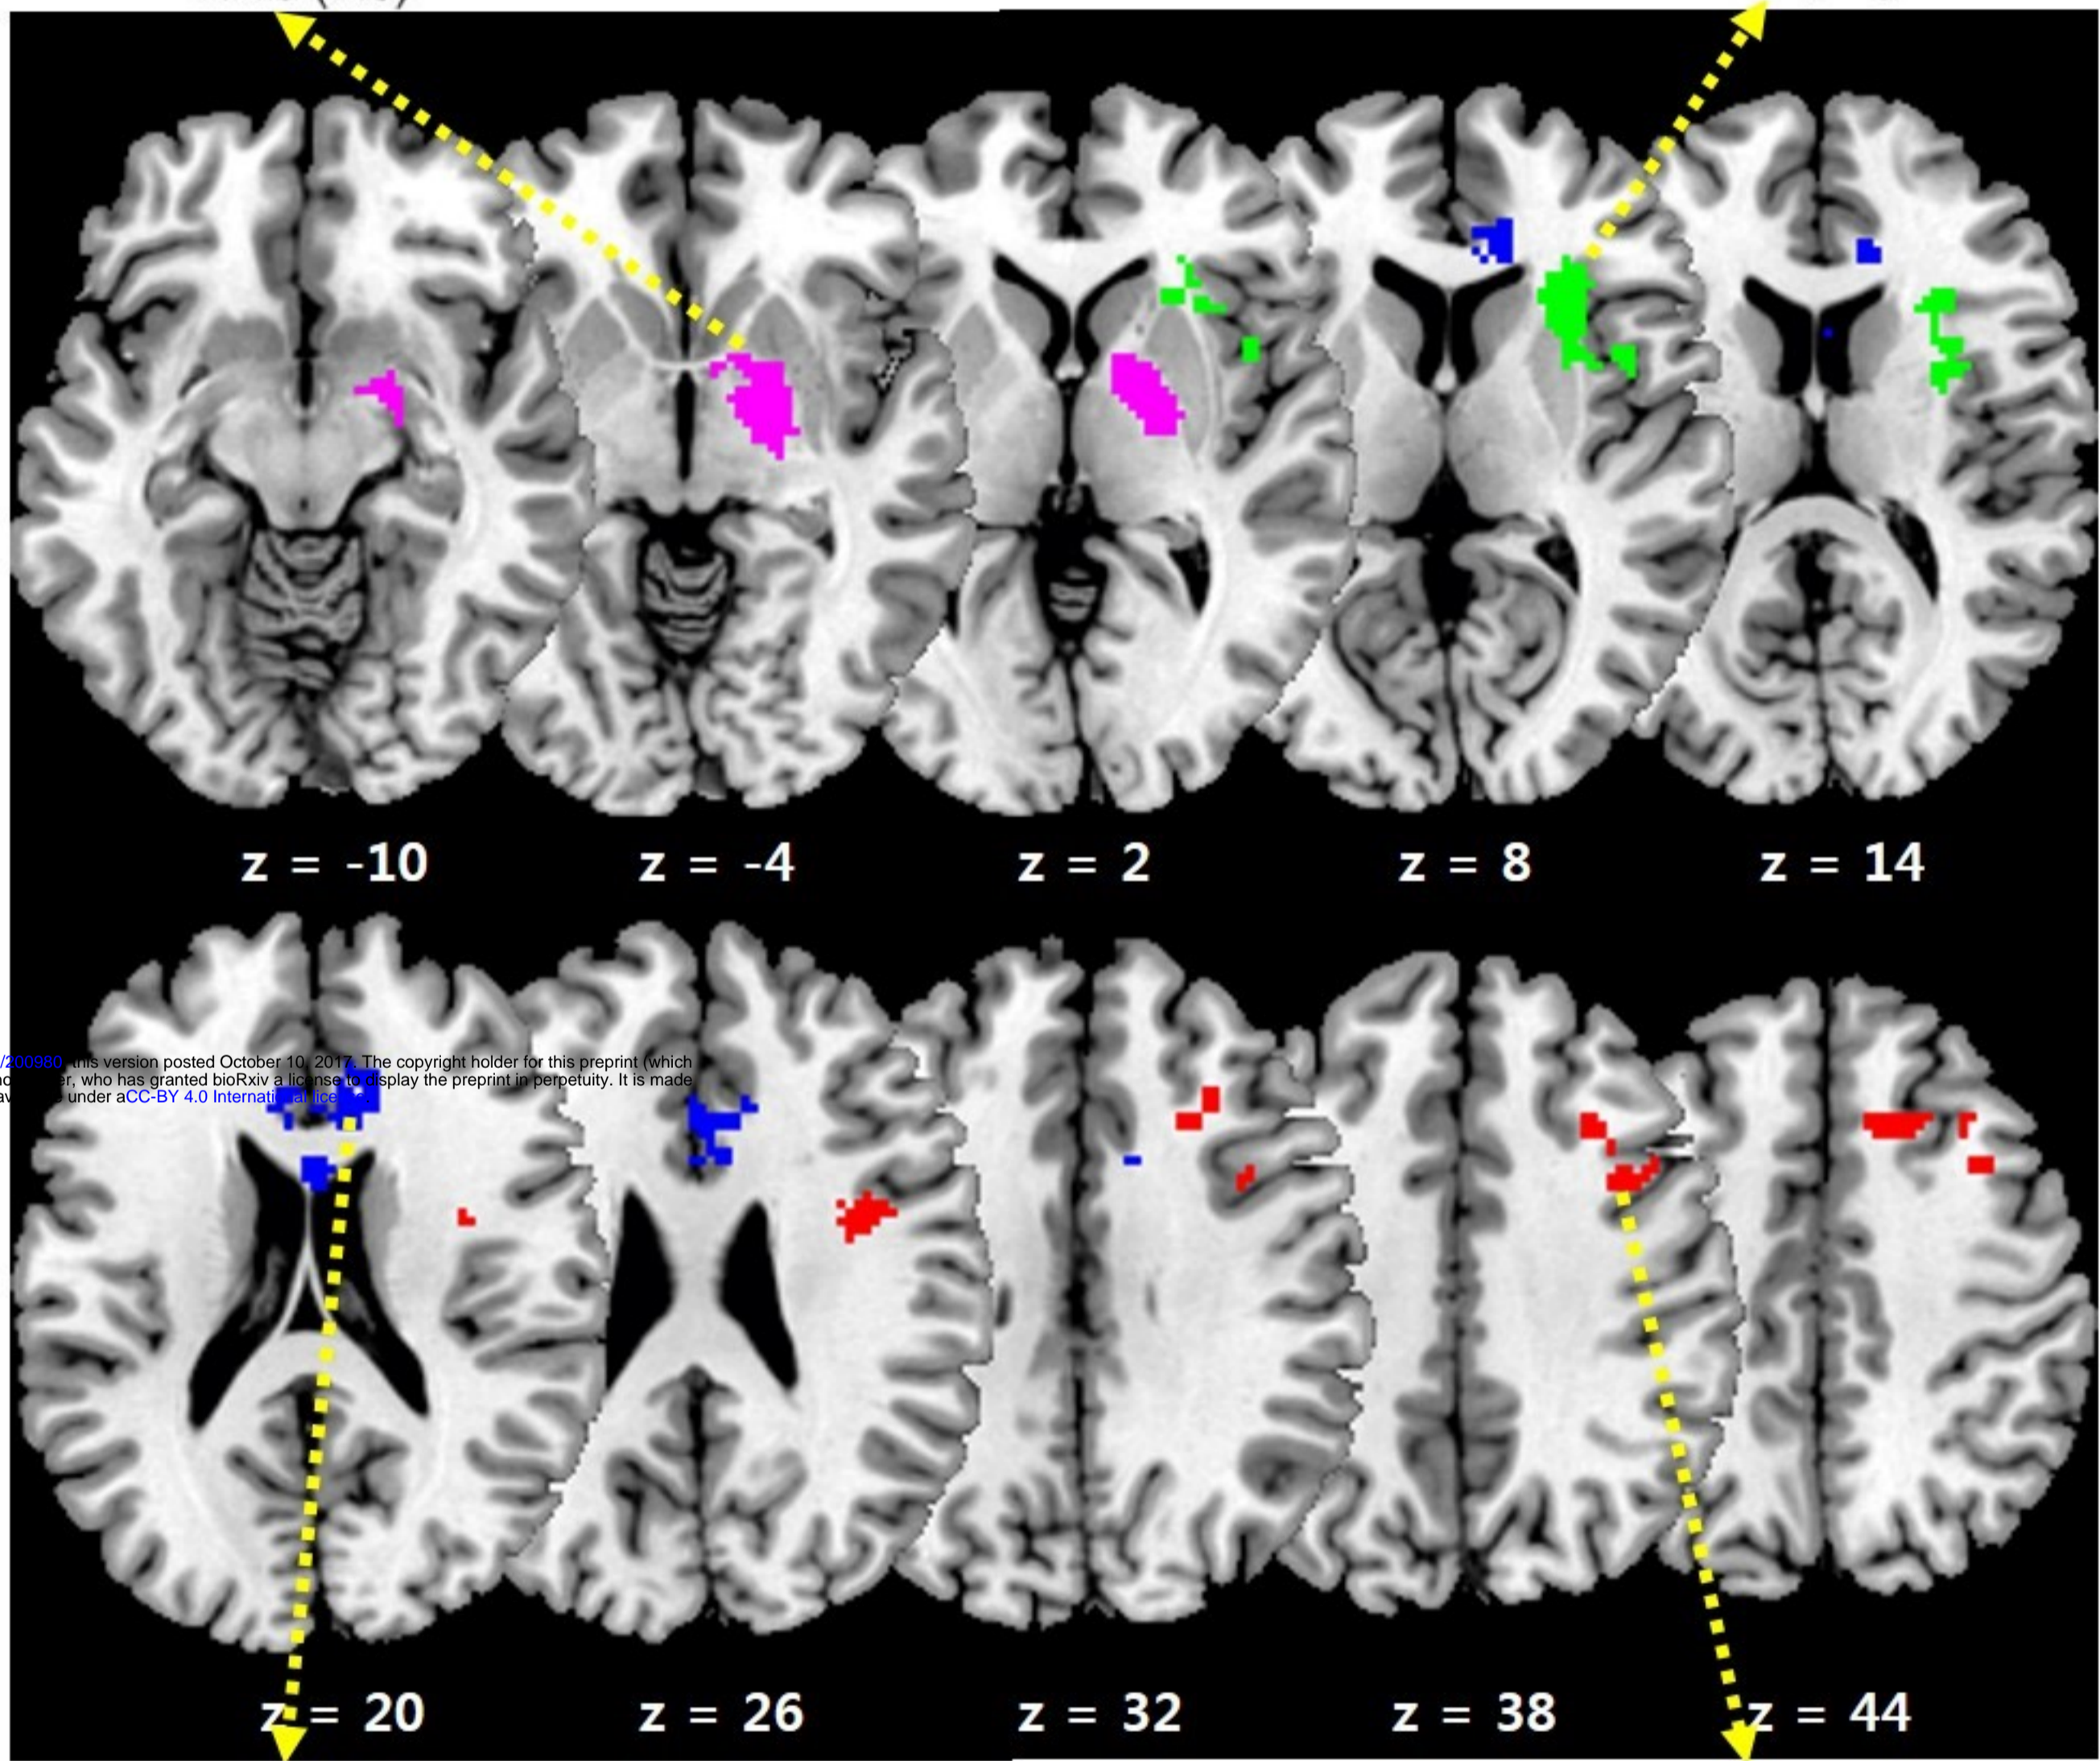

bioRxiv preprint doi: <https://doi.org/10.1101/200980>; this version posted October 10, 2017. The copyright holder for this preprint (which was not certified by peer review) is the author/funder, who has granted bioRxiv a license to display the preprint in perpetuity. It is made available under aCC-BY 4.0 International license.

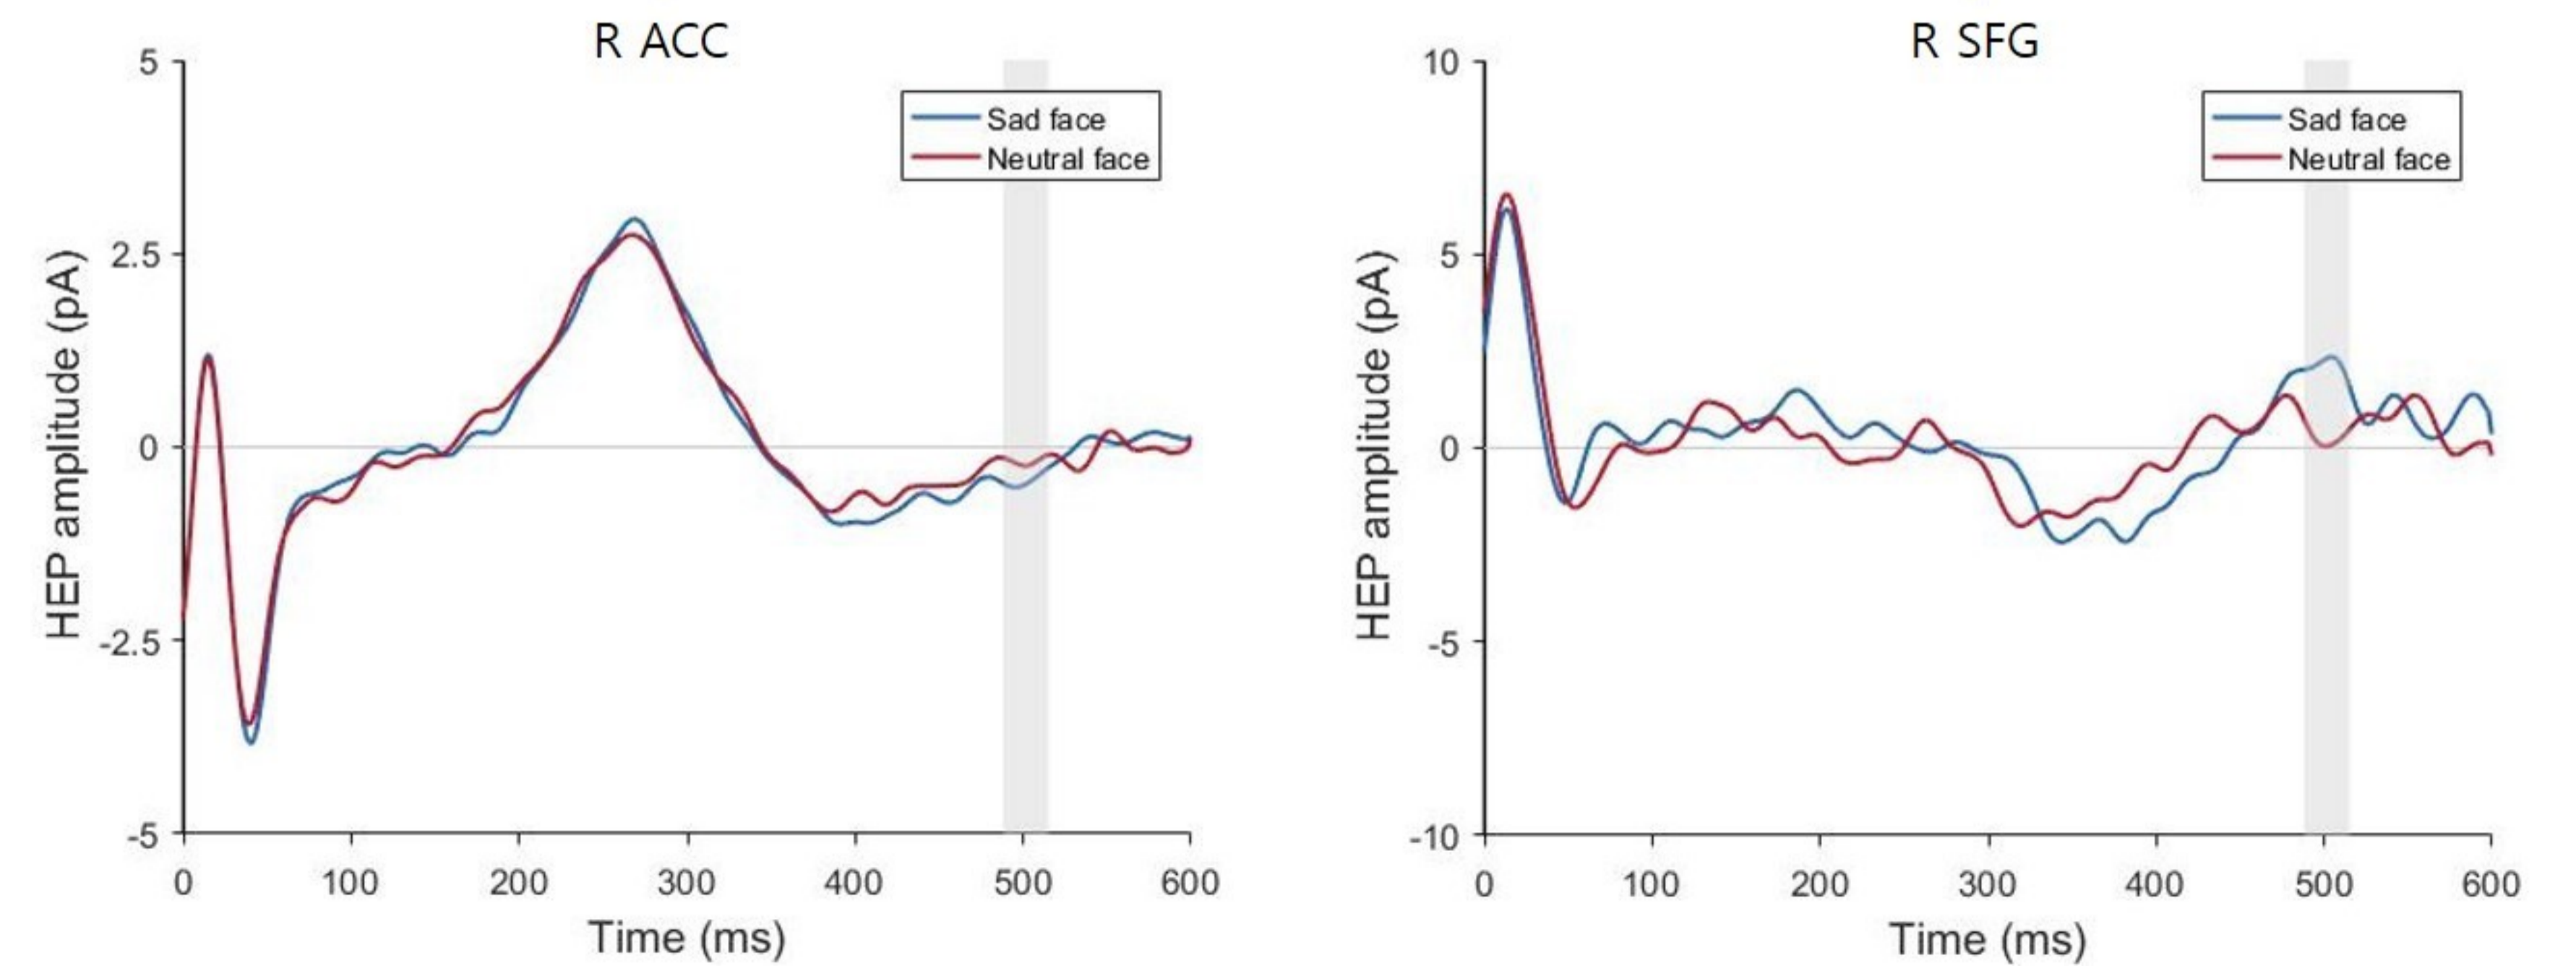

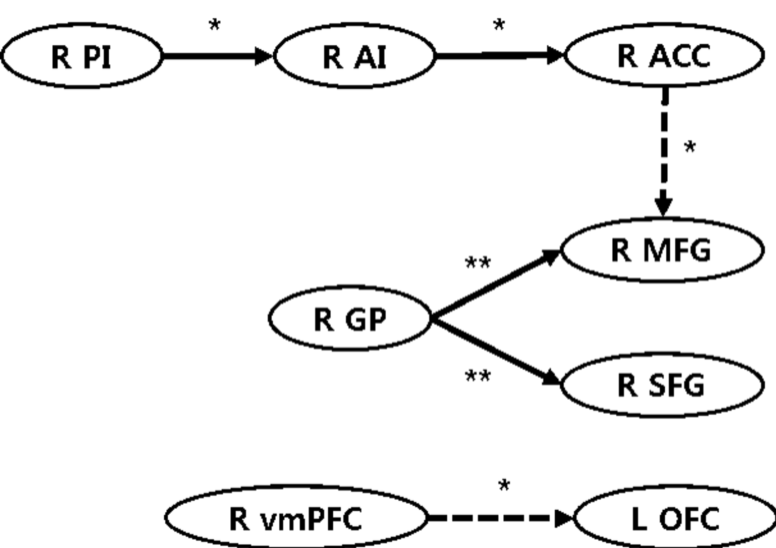

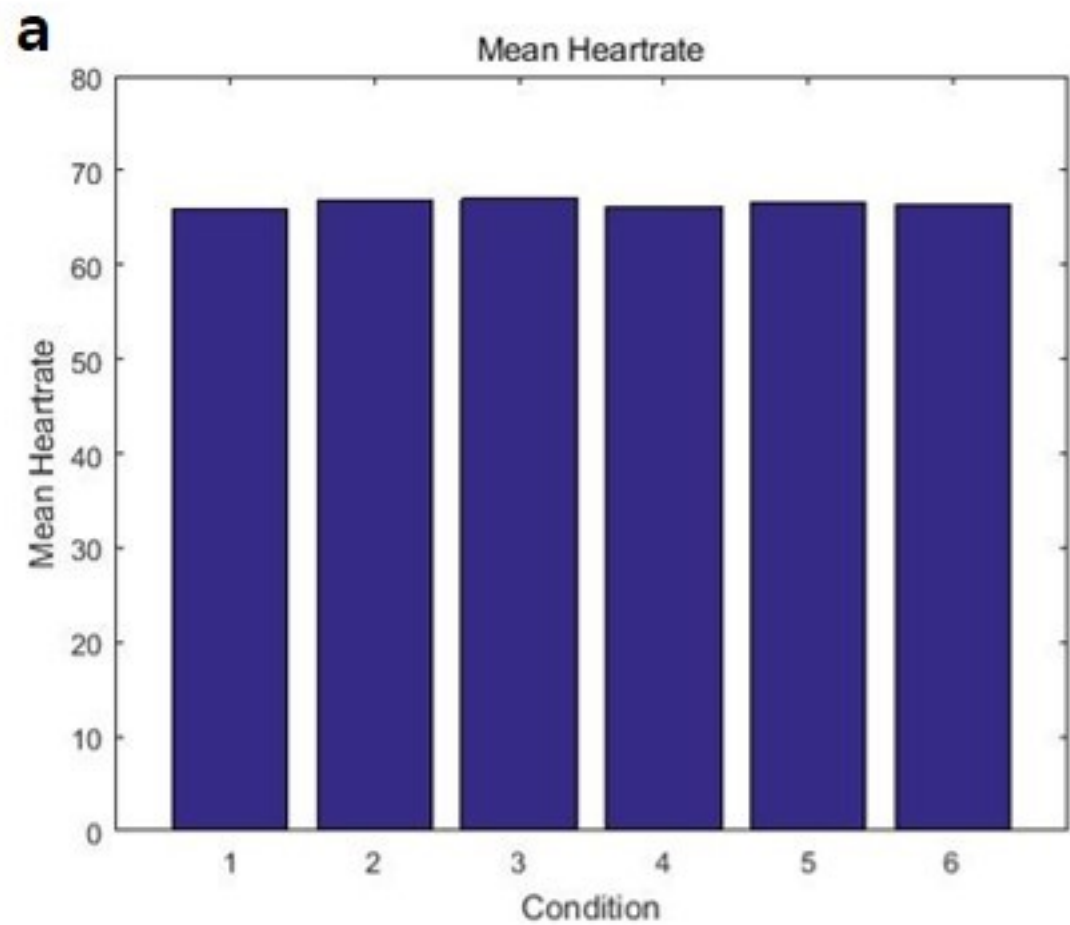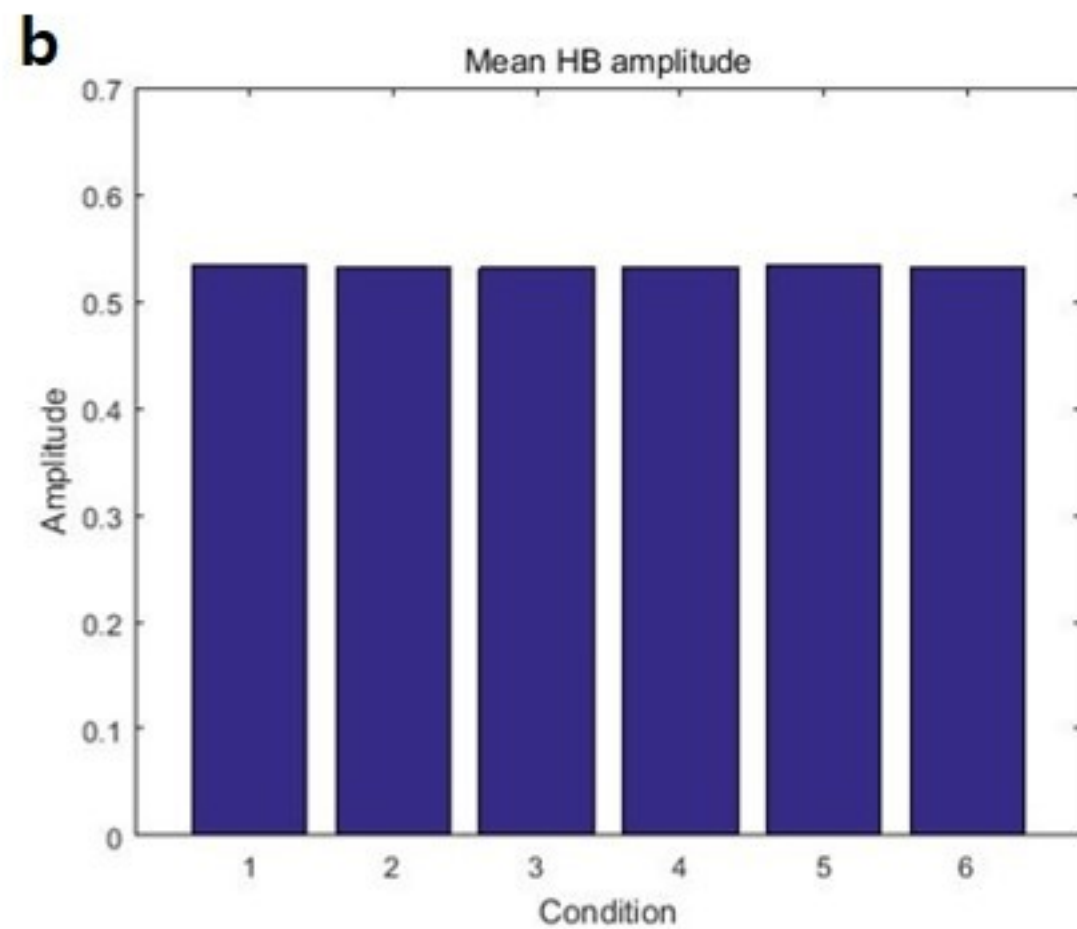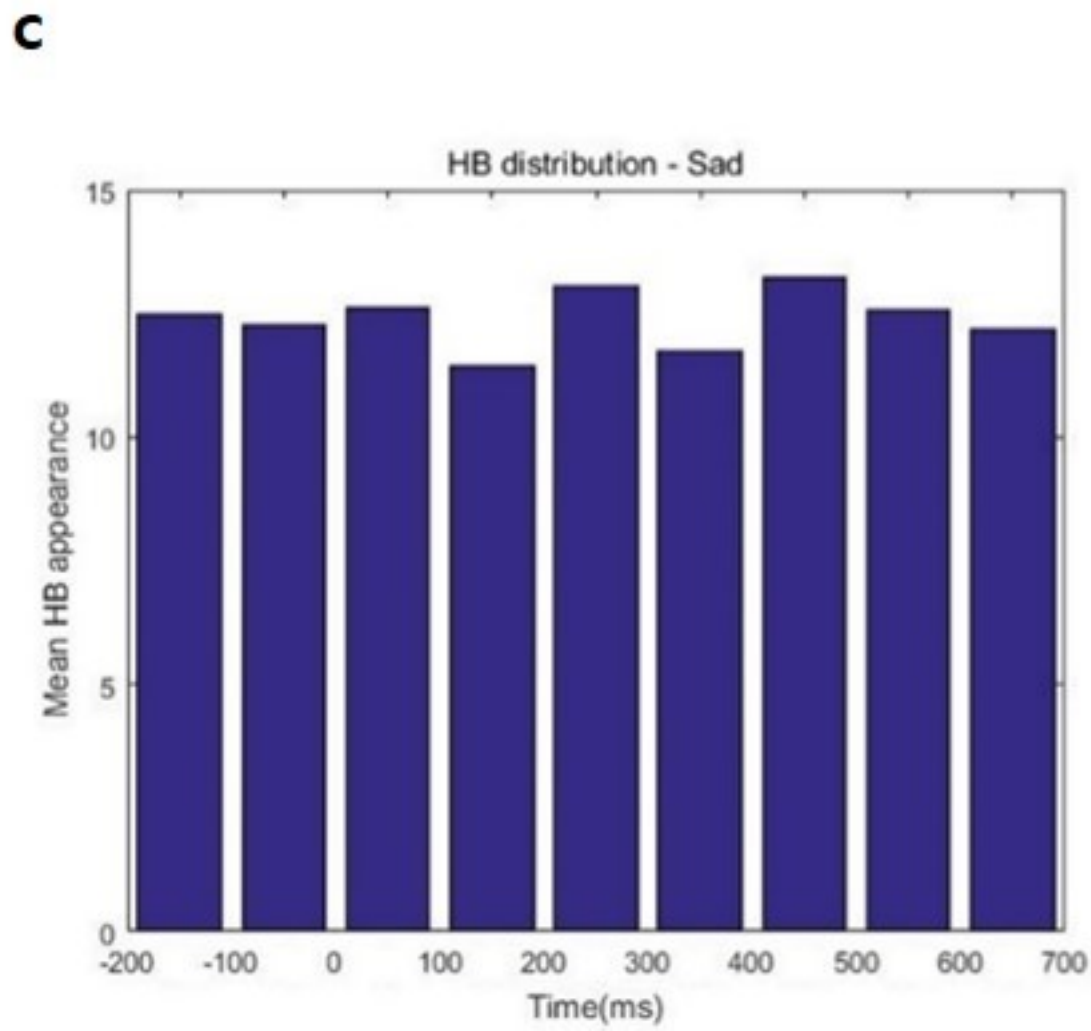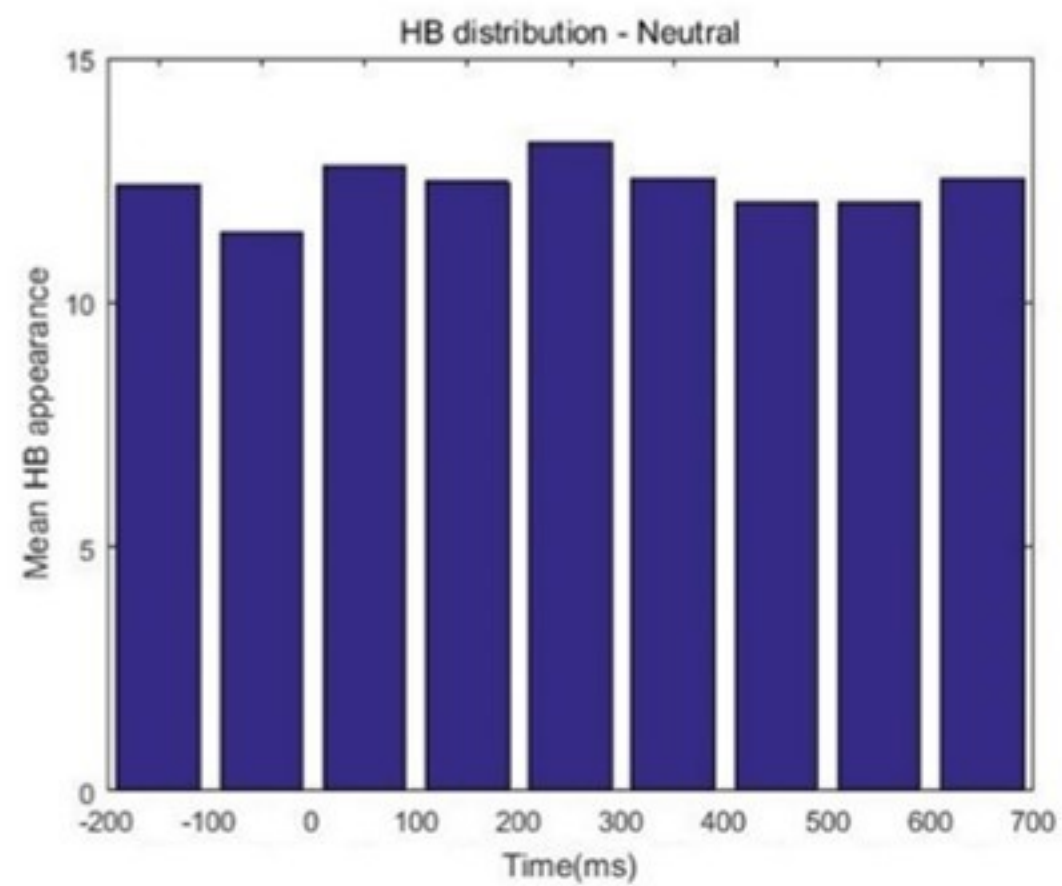



cluster statistics distribution

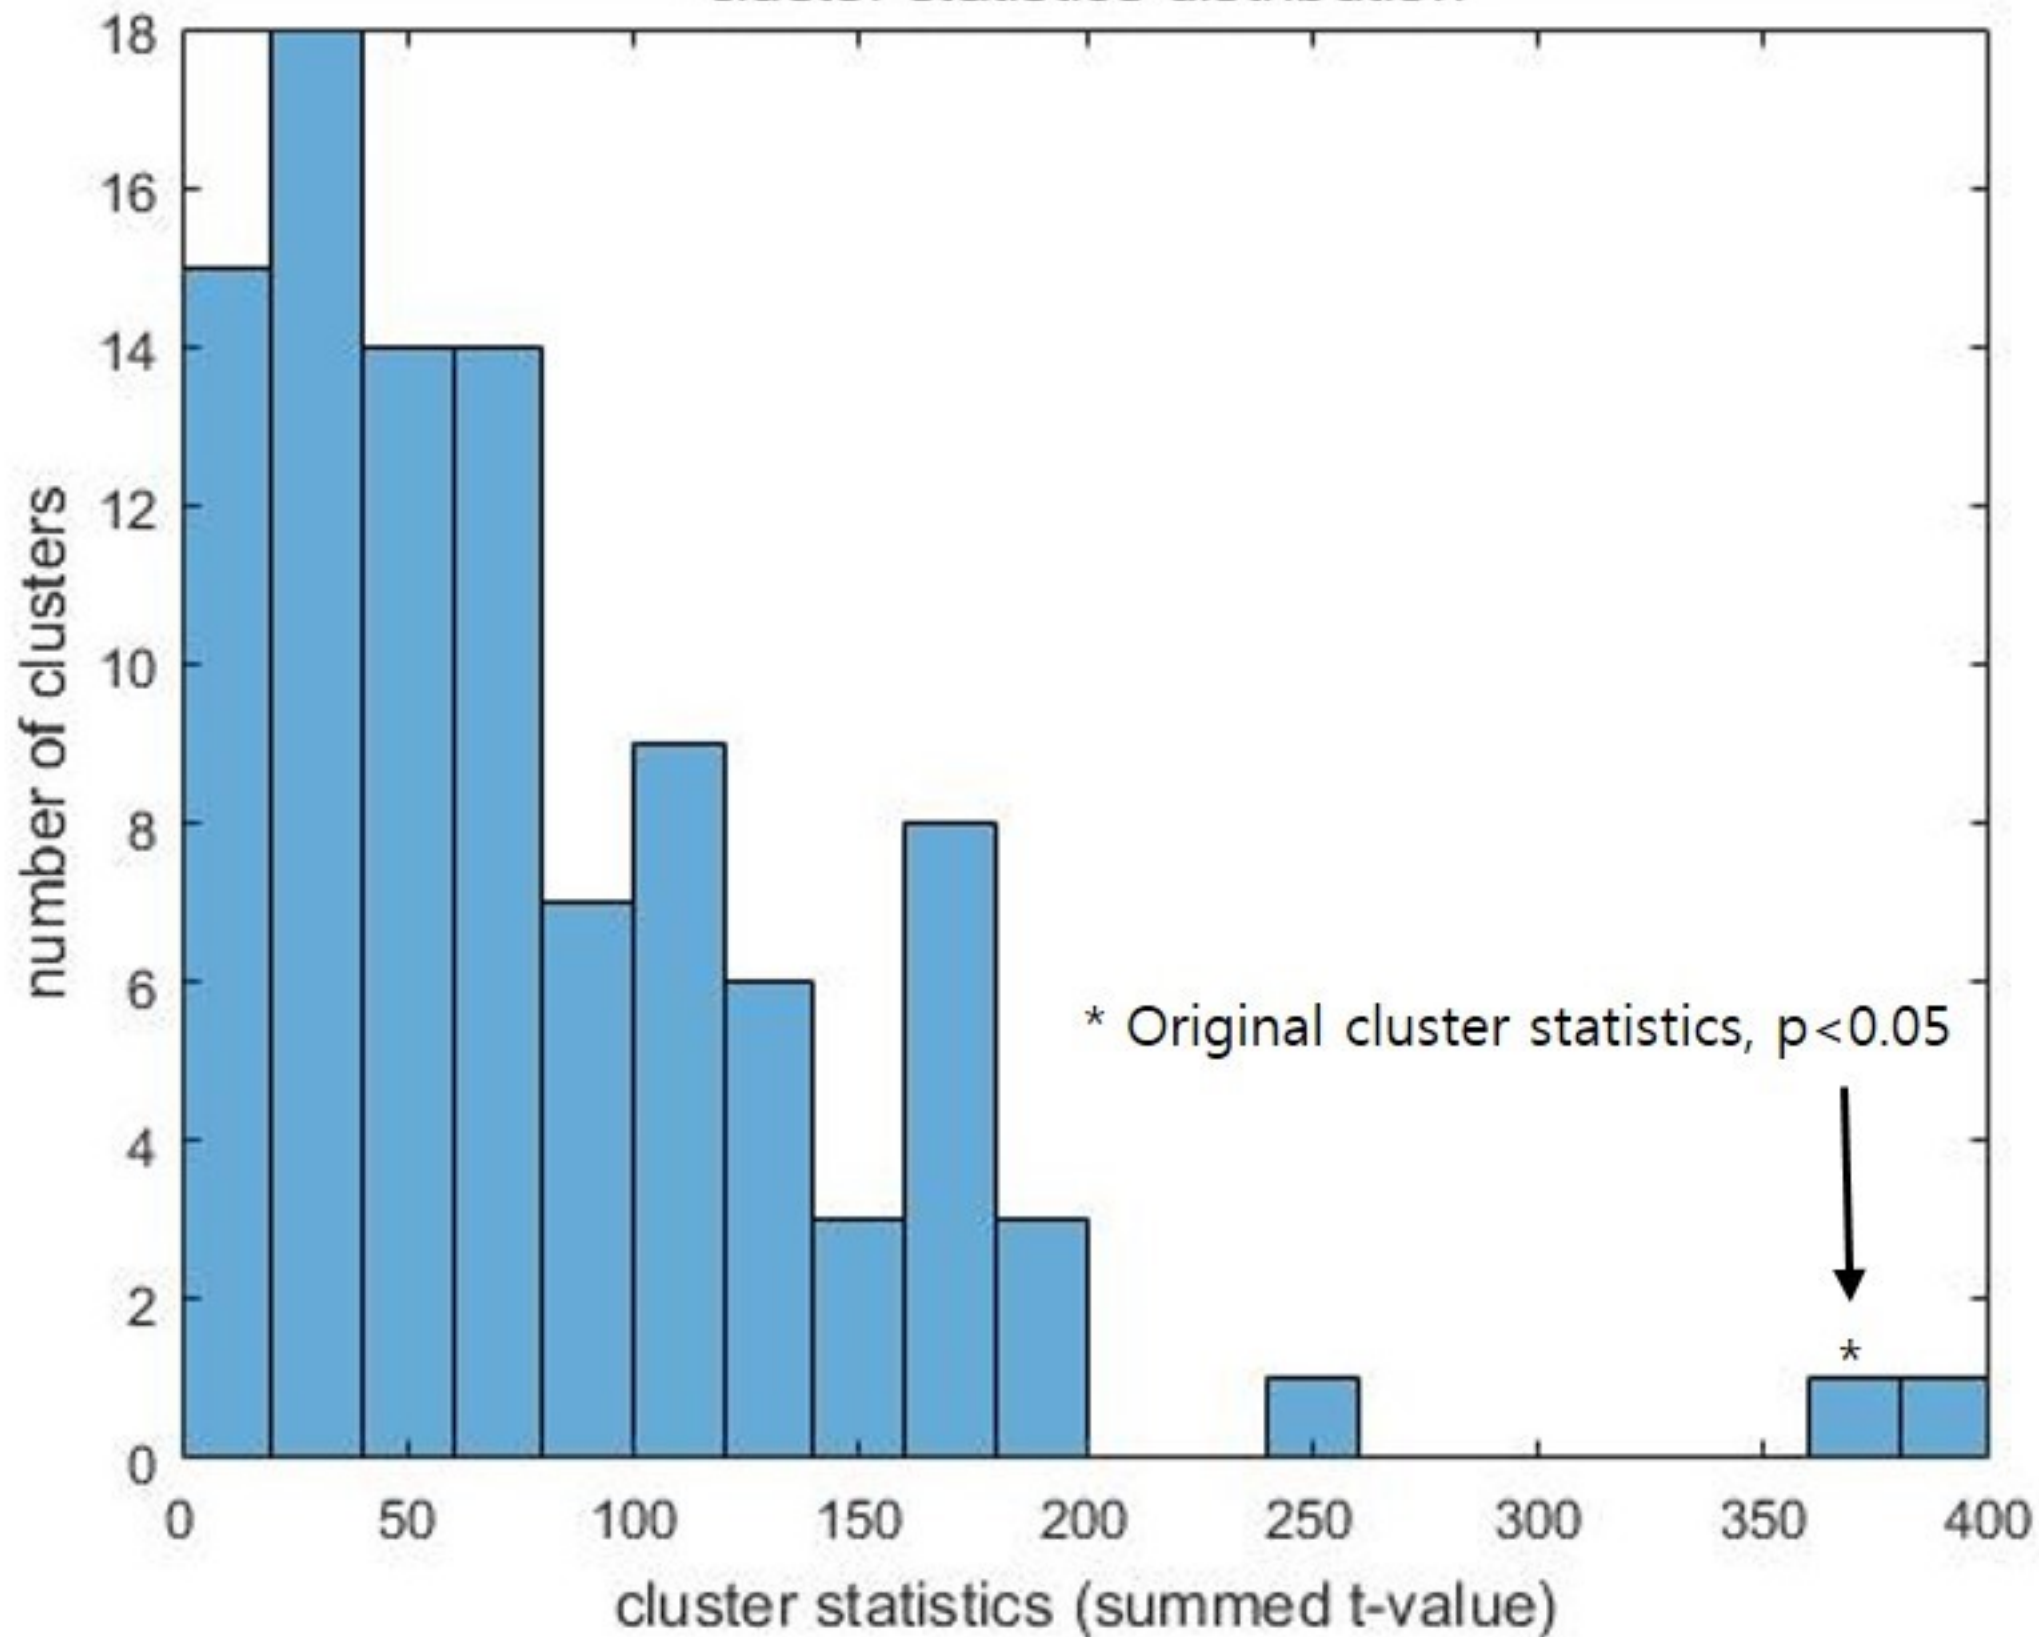

**Regions showing VEP difference in early time range (73ms ~ 198ms)**

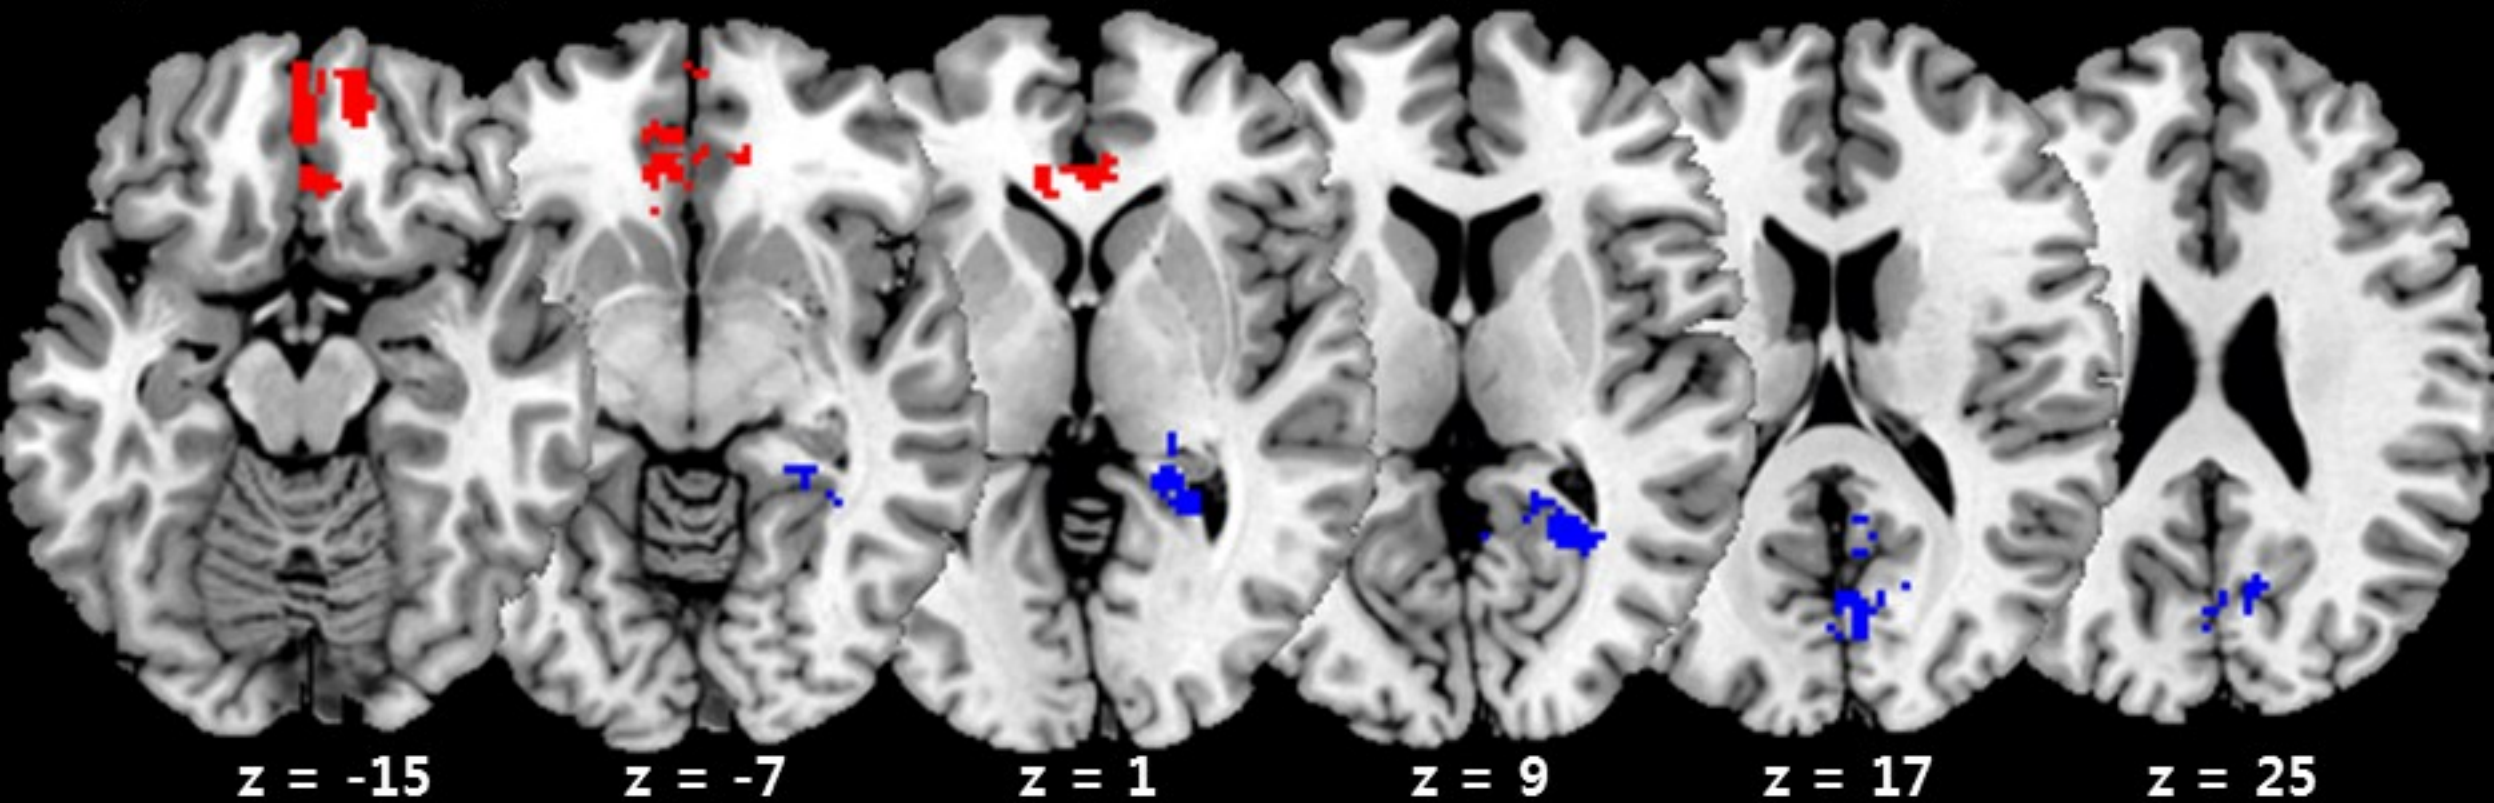

**Regions showing VEP difference in late time range (815ms ~ 948ms)**

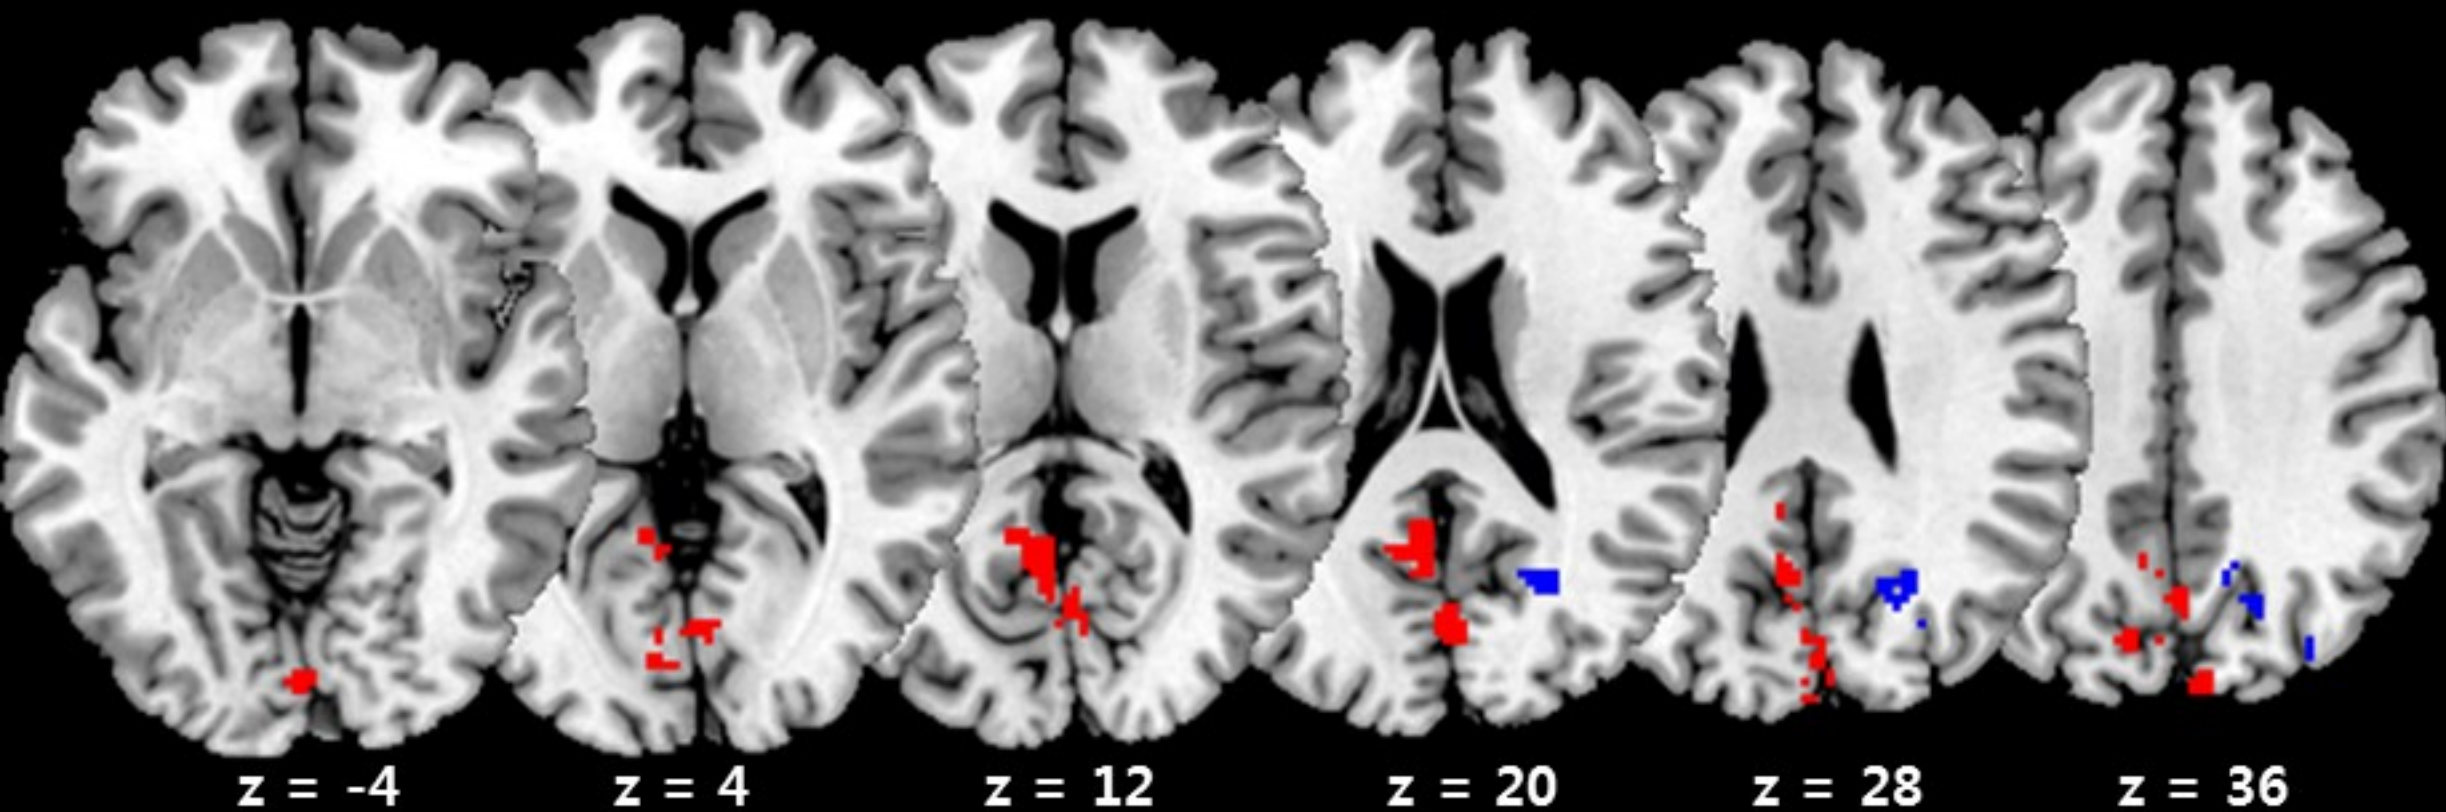

Source: https://www.biorxiv.org/content/10.1101/200980v1.full.pdf
